# Supplementary material for: A catalyst- and solvent-free protocol for the sustainable synthesis of fused 4H-pyran derivatives
Source: Royal Society of Chemistry journal article supplement (doi:10.1039/c9ra04370e), 2019-01-01

## Supporting Information

### A catalyst and solvent-free protocol for sustainable synthesis of fused 4*H*-pyran derivatives

Md. Musawwer Khan,<sup>a\*</sup> Sumbulunnisan Shareef,<sup>a</sup> Saigal,<sup>a</sup> and Subash C. Sahoo<sup>b</sup>

<sup>a</sup>*Department of Chemistry, Aligarh Muslim University, Aligarh, 202002, India*

<sup>b</sup>*Department of Chemistry & Center of Advanced Studies in Chemistry, Panjab University, Chandigarh-160014, India*

E-mail: [musawwer@gmail.com](mailto:musawwer@gmail.com)

### Table of Content

|                                                                      |         |
|----------------------------------------------------------------------|---------|
| <b>I.</b> Experimental section                                       | S2      |
| <b>II.</b> Crystallographic description of <b>4a</b> & <b>6b</b>     | S3 - S4 |
| <b>III.</b> Copies of <sup>1</sup> H and <sup>13</sup> C NMR spectra | S5- S20 |
| <b>IV.</b> Copies of HRMS Spectra of <b>4a</b> & <b>6a</b>           | S21     |

## Experimental section

### General

4-Hydroxycoumarin, 3-methyl-1-phenyl-5-pyrazolone and all the aldehydes were procured from Sigma-Aldrich. All the solvents were obtained from Merck and Otto Chemie. All the reactions were completed on REMI 2MLH thermo-mechanical stirrer. TLC analysis was carried out using silica gel GF-254 from SRL (Alfa Aesar). Melting points were obtained on a digital apparatus and are uncorrected. IR spectra were done in potassium bromide (KBr) pellets on a Perkin-Elmer 10.4.00 IR spectrophotometer. <sup>1</sup>H-NMR and <sup>13</sup>C-NMR spectral analysis were done on Bruker (Avance-II 400 MHz), Varian-AS 400 NMR, and Bruker BioSpin GmbH spectrometers using tetramethylsilane (TMS) as an internal standard and DMSO-*d*<sub>6</sub> or CDCl<sub>3</sub> as a solvent. Crystal data were collected with a Super Nova, single source at offset/far, HyPix3000 diffractometer (CCD) using graphite monochromated MoKa radiation ( $k\lambda/0.71073 \text{ \AA}$ ) at 296 K. HRMS spectra was recorded on high resolution mass spectrometer XEVO G2-XS QTOF.

### General procedure for the preparation of functionalized fused 4*H*-pyrans:

First, a dried 5 ml round bottom flask was equipped by teflon coated magnet and charged with a combination of 3-methyl-1-phenyl-1*H*-pyrazol-5(4*H*)-one/4-hydroxycoumarin (1 mmol), aromatic aldehydes (1 mmol), and NMSM (1 mmol). The mixture of all reagents was heated at 110 °C with stirring for mentioned time under neat conditions. Progress of the reactions was monitored by TLC. After completion of the reaction as indicated by TLC, the resulting precipitate was cooled and 2 ml of ethanol was added to stirr for 5 min. Next, the precipitate was filtered and washed with cold ethanol. After that, purification of the crude was done by recrystallization from hot acetonitrile to yield the pure products.

## II. Crystallographic Description

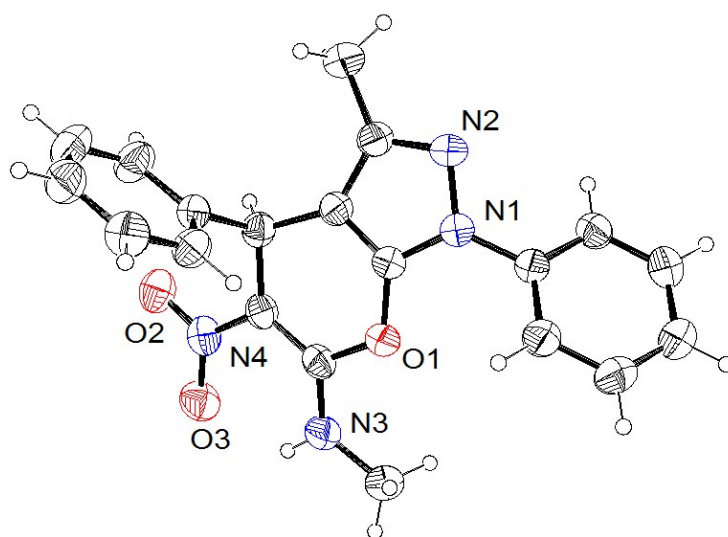

**Fig 2.** ORTEP representation of compound **4a** (CCDC 1901104)

**Table 1.** Crystal data for **4a** (CCDC 1901104)

|                                   |                                                                                                                        |
|-----------------------------------|------------------------------------------------------------------------------------------------------------------------|
| Empirical formula                 | $C_{20}H_{18}N_4O_3$                                                                                                   |
| Formula weight                    | 362.38                                                                                                                 |
| Wavelength                        | 0.71073 Å                                                                                                              |
| Temperature                       | 293(2) K                                                                                                               |
| Crystal system, space group       | Monoclinic, P-2                                                                                                        |
| Unit cell dimension (Å)           | $a = 10.7875(3)$ $\alpha = 90$ deg.<br>$b = 20.8262(4)$ $\beta = 99.106(2)$ deg.<br>$c = 8.0335(2)$ $\gamma = 90$ deg. |
| Volume                            | $1782.08(8)$ Å <sup>3</sup>                                                                                            |
| Z, Calculated density             | 4, 1.351 g/cm <sup>3</sup>                                                                                             |
| Absorption coefficient            | $0.094$ mm <sup>-1</sup>                                                                                               |
| F (000)                           | 760.0                                                                                                                  |
| Absorption correction             | multi-scan                                                                                                             |
| Reflection collected              | 21157                                                                                                                  |
| Theta range for data collection   | 6.456 to 54.798 deg.                                                                                                   |
| Goodness-of-fit on F <sup>2</sup> | 1.070                                                                                                                  |

**Table 2.**Crystal data for **6b** (CCDC 1901105)

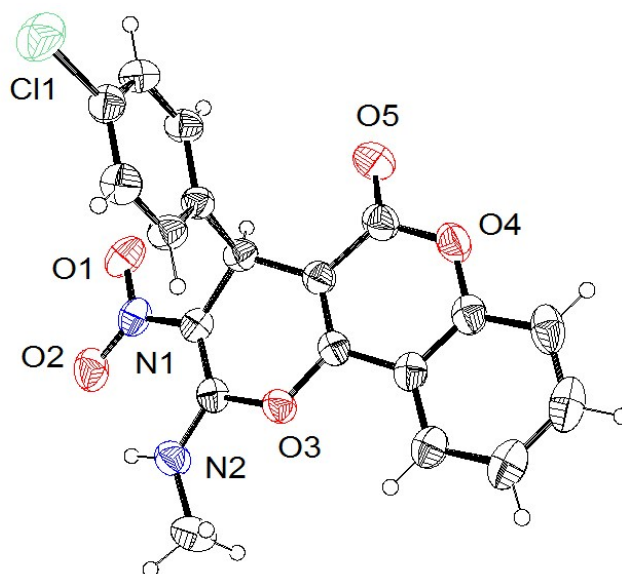

**Fig 3.**ORTEP representation of compound **6b** (CCDC1901105)

|                                   |                                                                                                                       |
|-----------------------------------|-----------------------------------------------------------------------------------------------------------------------|
| Empirical formula                 | C <sub>19</sub> H <sub>13</sub> ClN <sub>2</sub> O <sub>5</sub>                                                       |
| Formula weight                    | 384.76                                                                                                                |
| Wavelength                        | 0.71073 Å                                                                                                             |
| Temperature                       | 293(2) K                                                                                                              |
| Crystal system, space group       | Monoclinic, P-2                                                                                                       |
| Unit cell dimension (Å)           | a = 8.5412(2)    alpha = 90.0 deg.<br>b = 13.1791(3)    beta = 96.973(2) deg.<br>c = 14.8906 (3)    gamma = 90.0 deg. |
| Volume                            | 1663.77(6) Å <sup>3</sup>                                                                                             |
| Z, Calculated density             | 4, 1.536 g/cm <sup>3</sup>                                                                                            |
| Absorption coefficient            | 0.266 mm <sup>-1</sup>                                                                                                |
| F (000)                           | 792.0                                                                                                                 |
| Absorption correction             | multi-scan                                                                                                            |
| Reflection collected              | 3695                                                                                                                  |
| Theta range for data collection   | 6.594 to 54.844 deg.                                                                                                  |
| Goodness-of-fit on F <sup>2</sup> | 1.090                                                                                                                 |

### III. Copies of $^1\text{H}$ and $^{13}\text{C}$ NMR spectra:

#### *N,3-Dimethyl-5-nitro-1,4-diphenyl-1,4-dihydropyrano[2,3-c]pyrazol-6-amine (4a)*

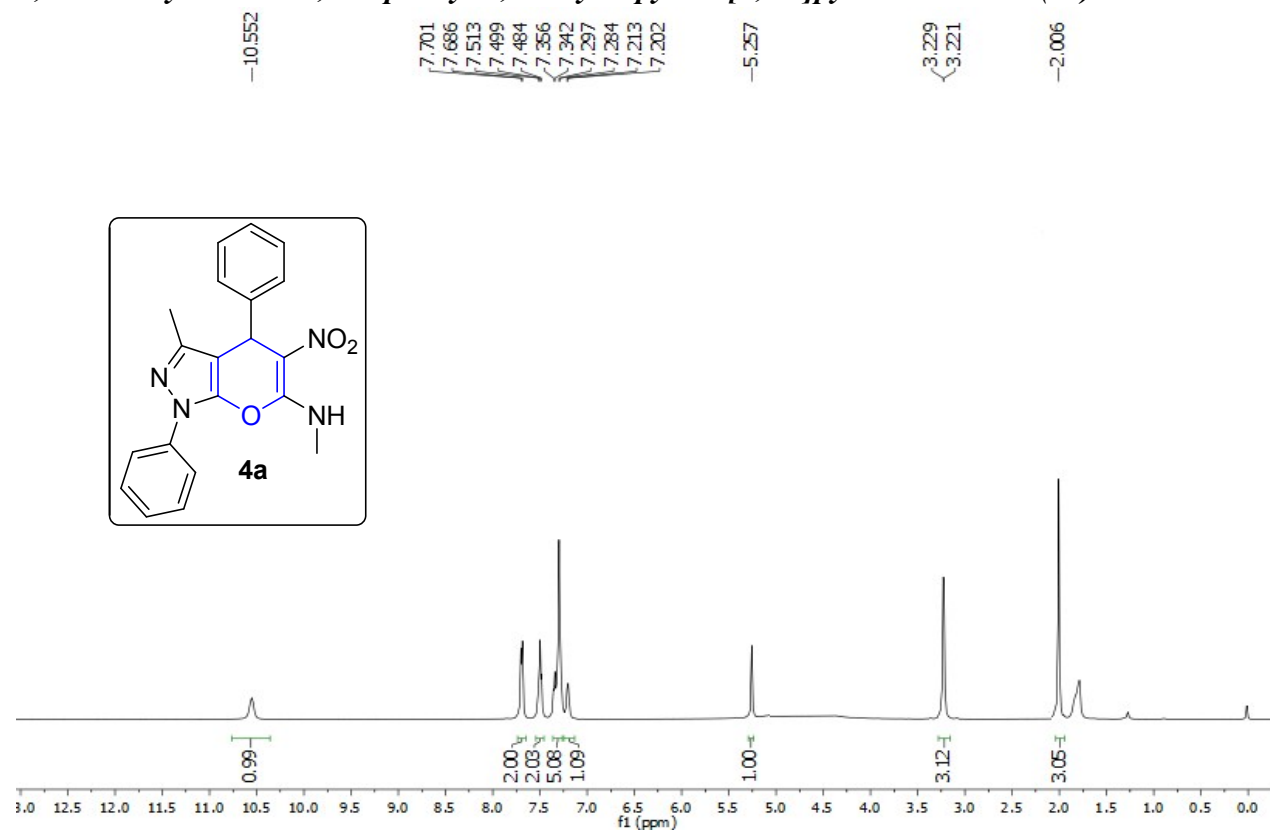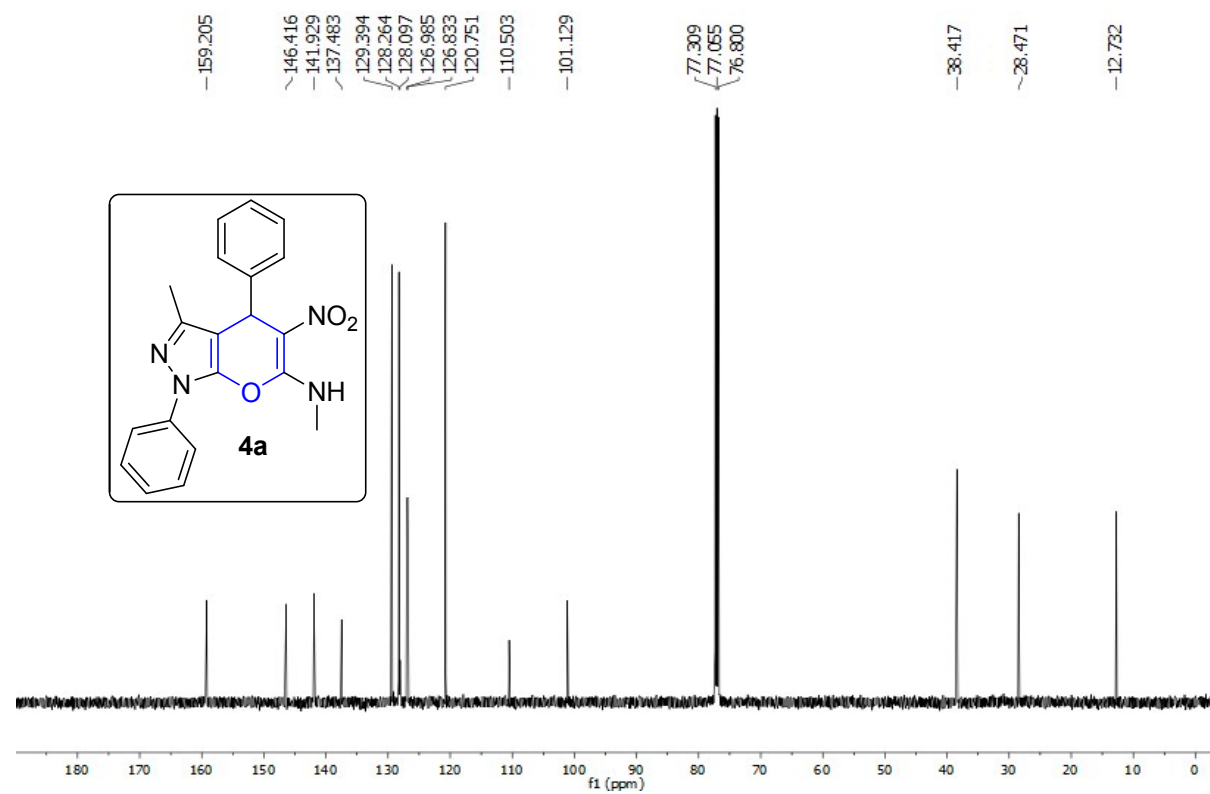

**4-(4-Chlorophenyl)-N,3-dimethyl-5-nitro-1-phenyl-1,4-dihydropyranopyrazol-6-amine (4b)**

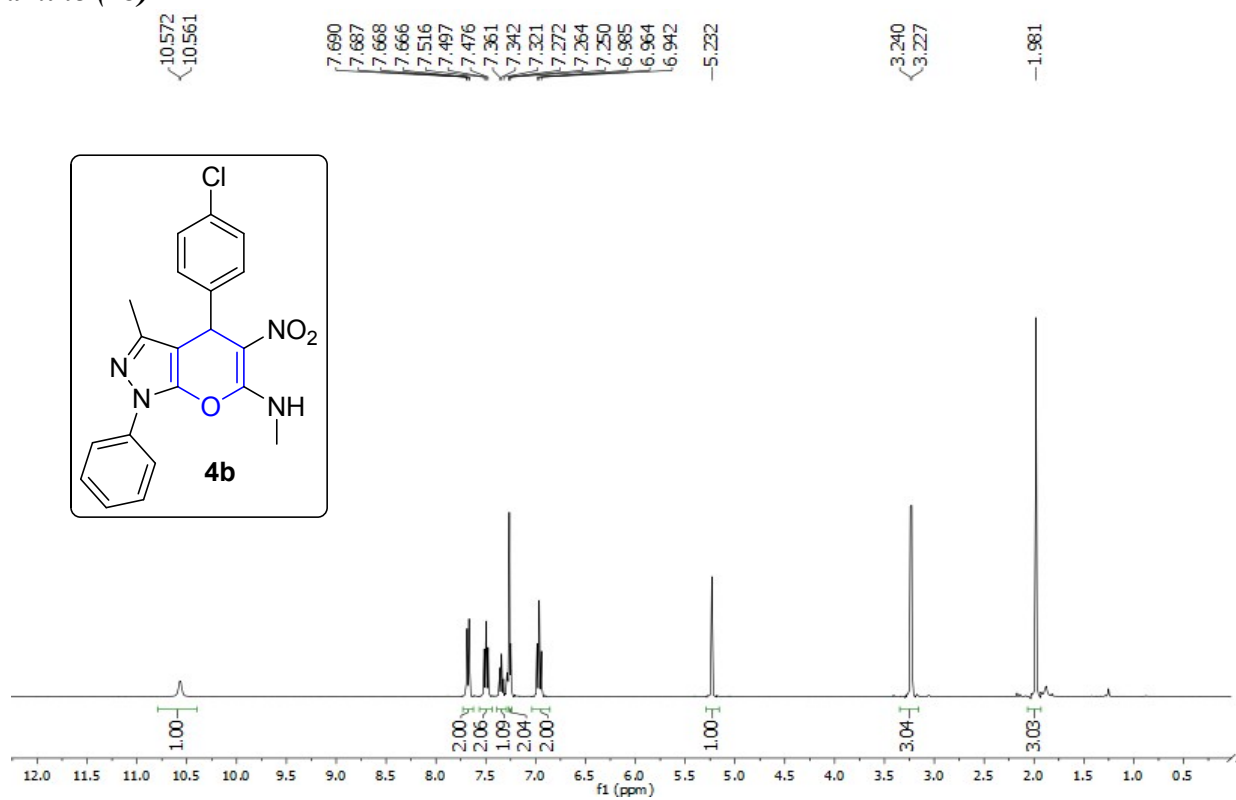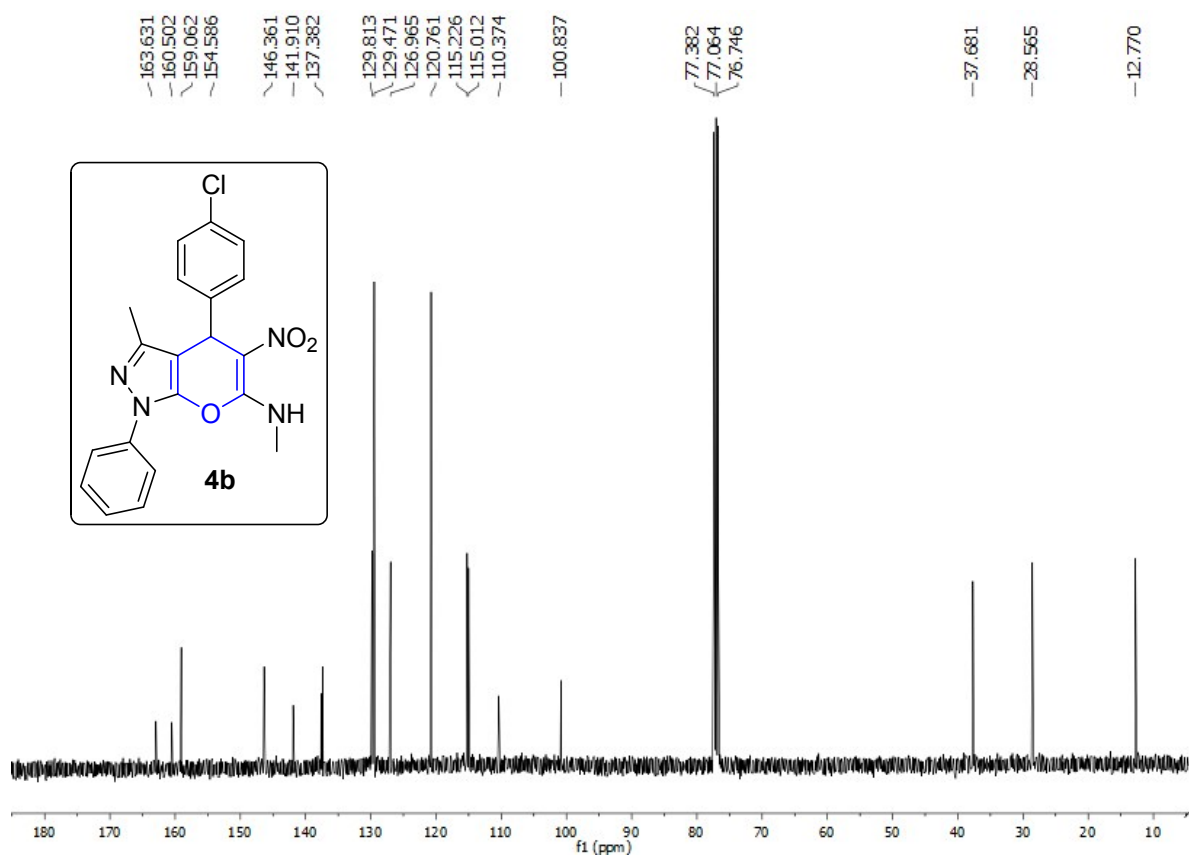

**4-(4-Bromophenyl)-N,3-dimethyl-5-nitro-1-phenyl-1,4-dihydropyranol[2,3-c]pyrazol-6-amine (4c)**

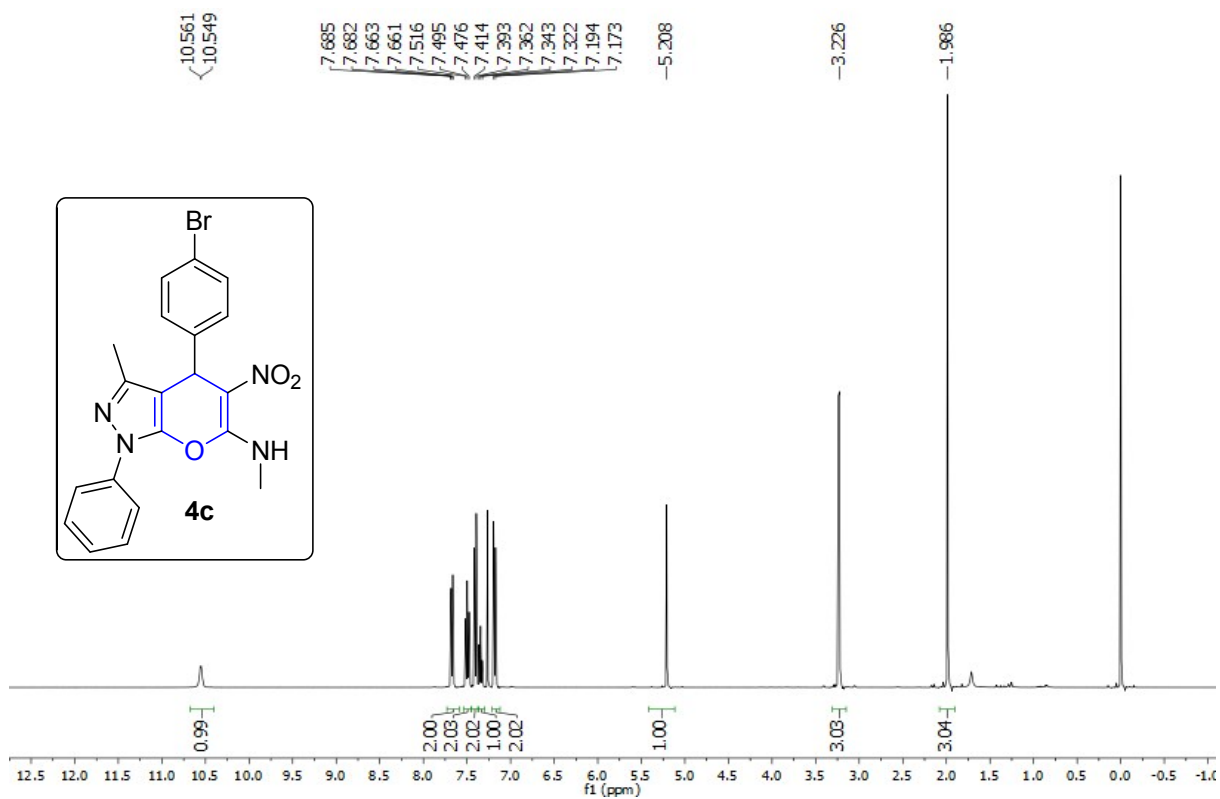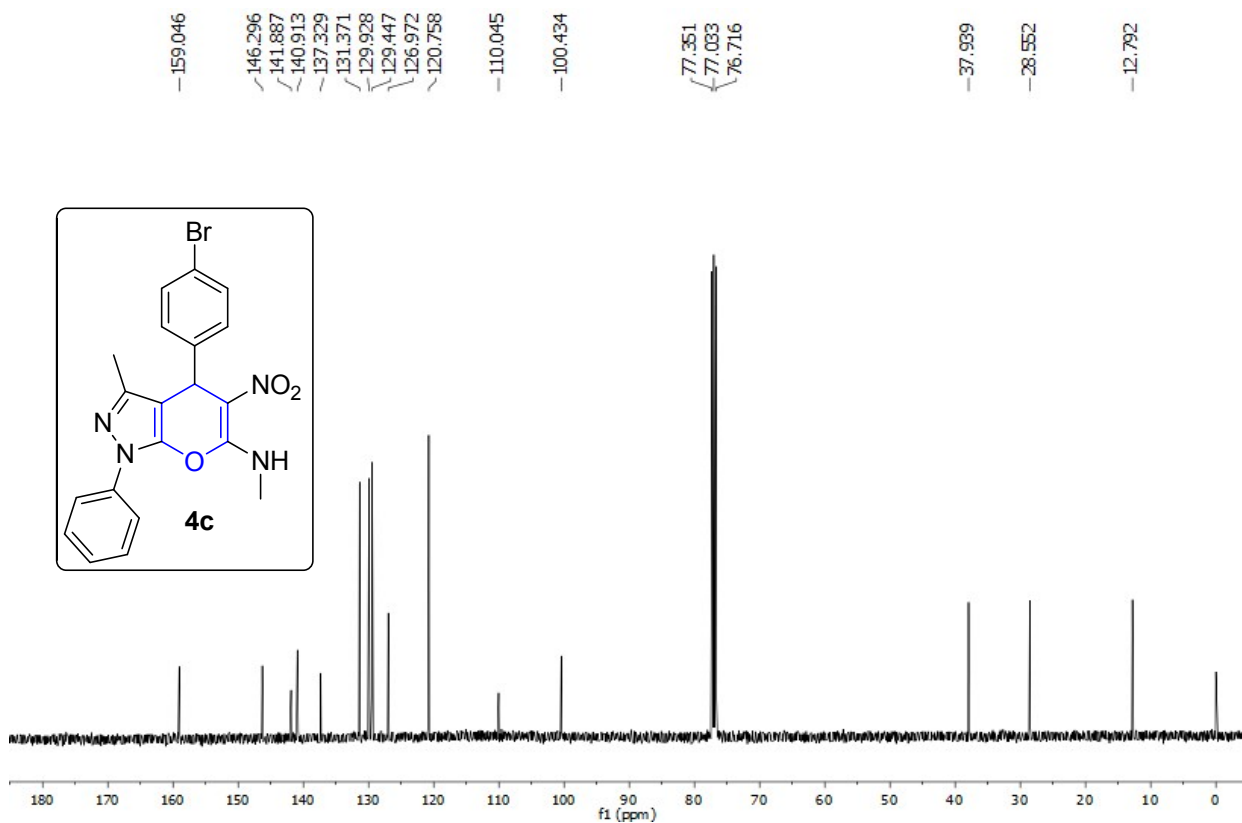

**4-(4-Fluorophenyl)-N, 3-dimethyl-5-nitro-1-phenyl-1,4-dihydropyranopyrazol-6-amine (4d)**

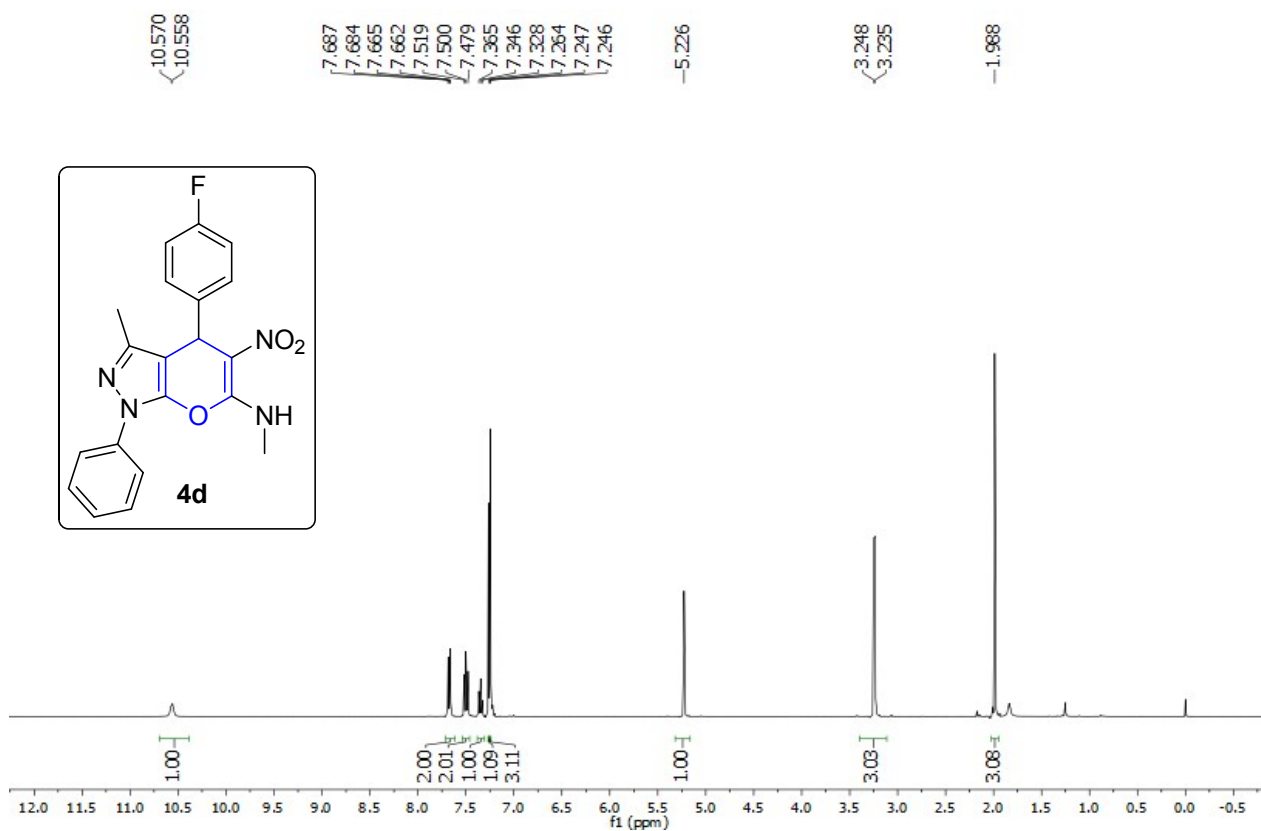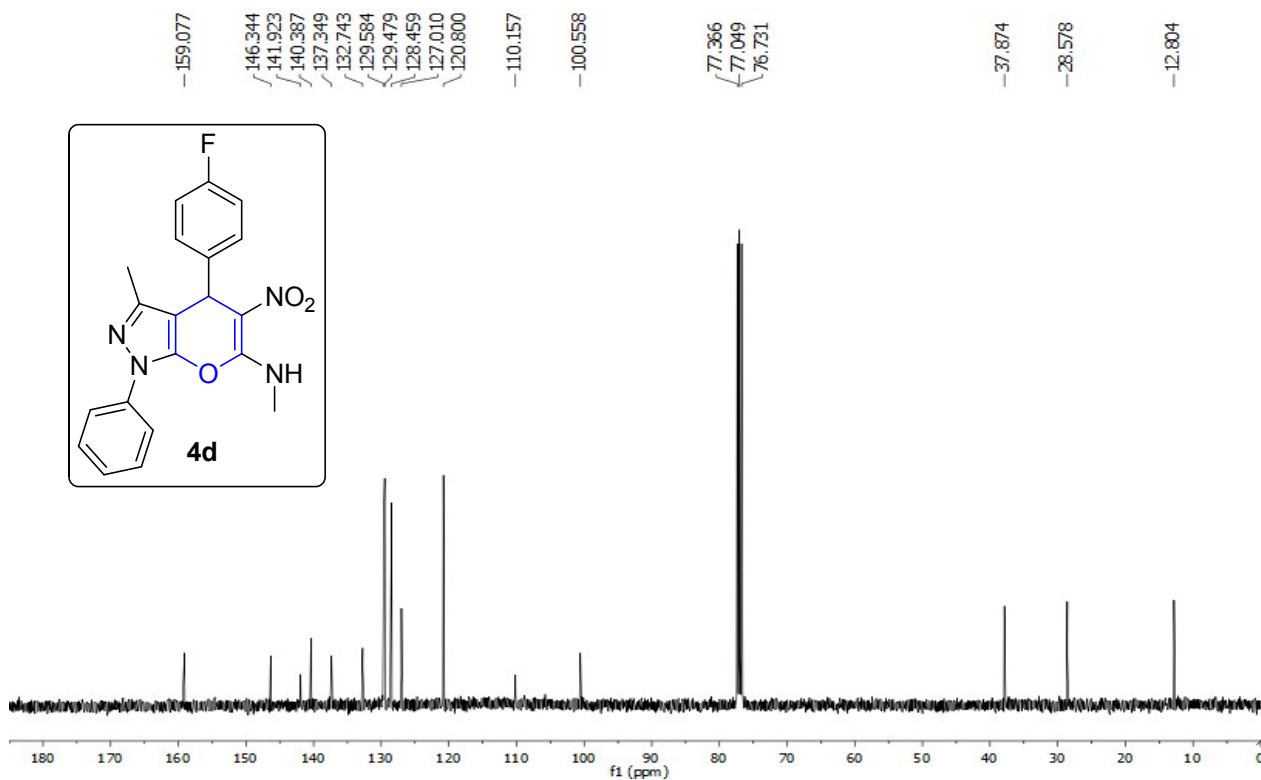



**4-(4-Ethylphenyl)-N,3-dimethyl-5-nitro-1-phenyl-1,4-dihydropyranol[2,3-c]pyrazol-6-amine (4f)**

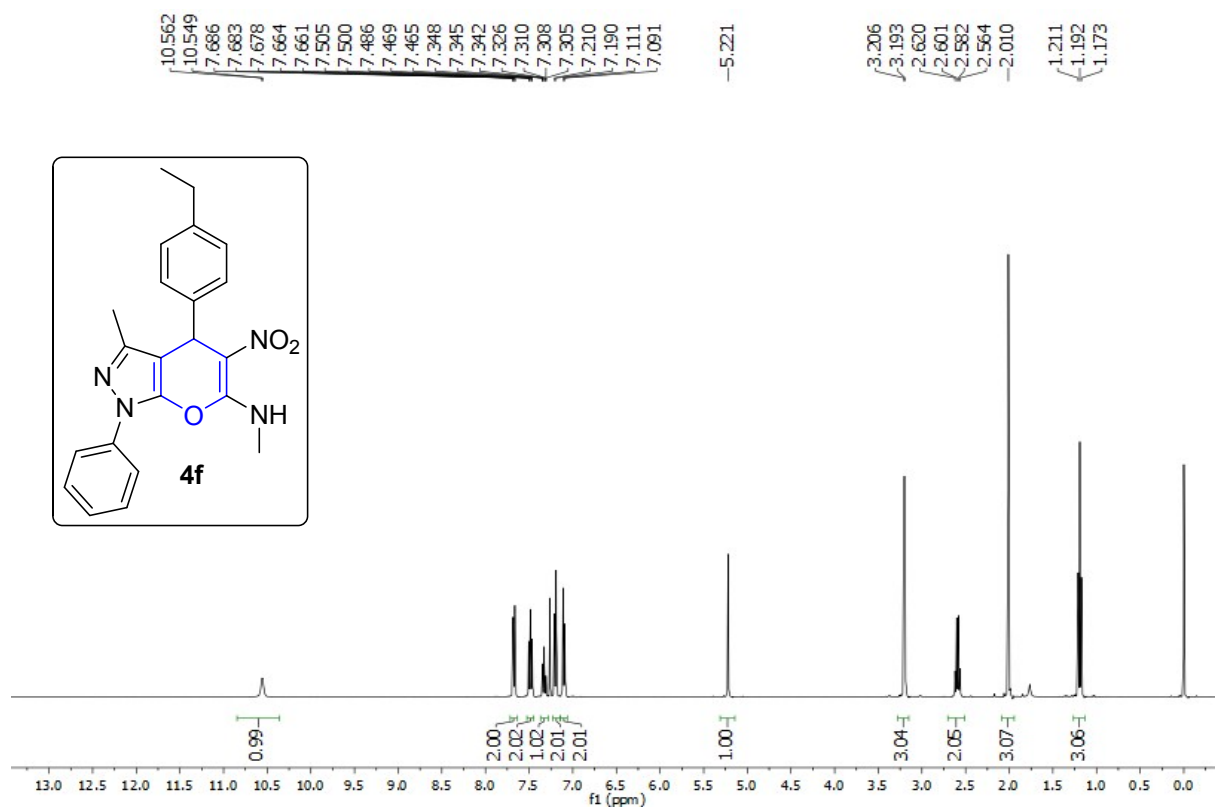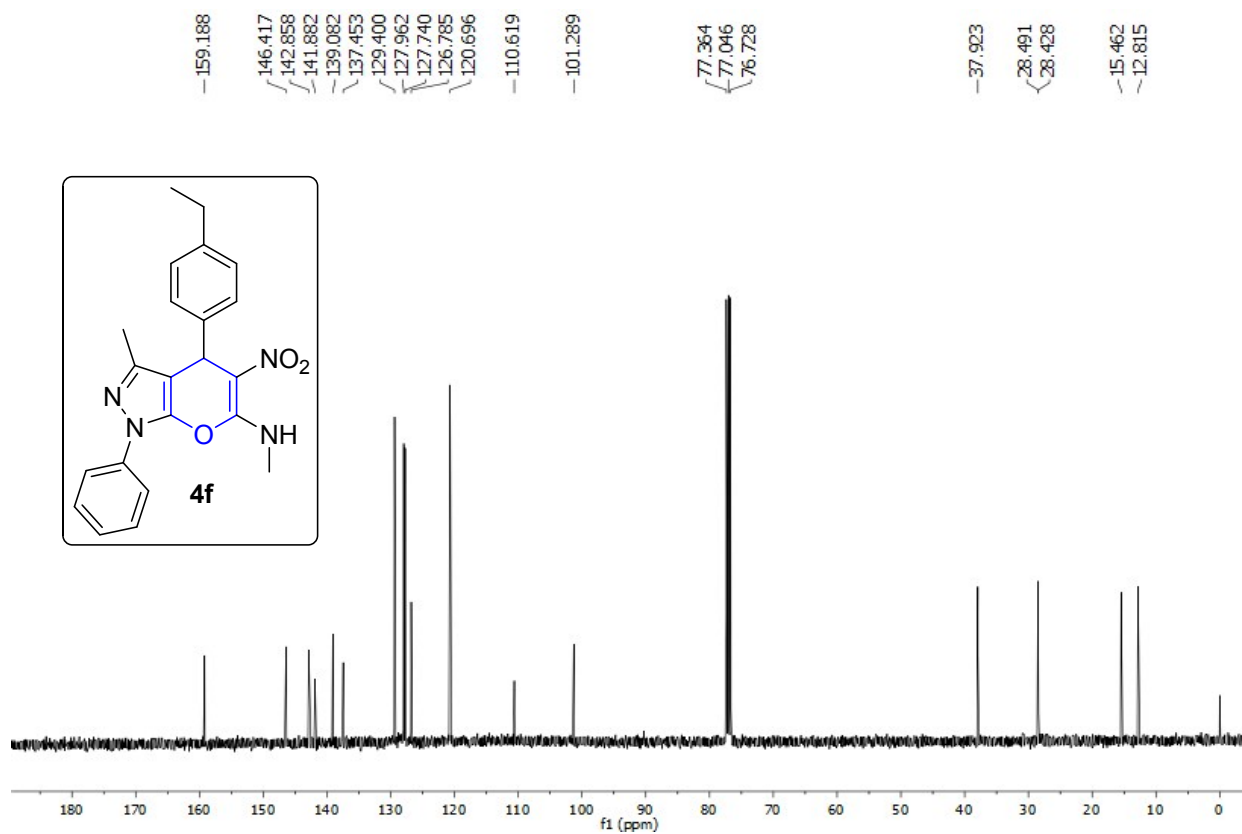

***N*, 3-Dimethyl-5-nitro-4-(4-nitrophenyl)-1-phenyl-1,4-dihydropyrano[2,3-*c*]pyrazol-6-amine (4g)**

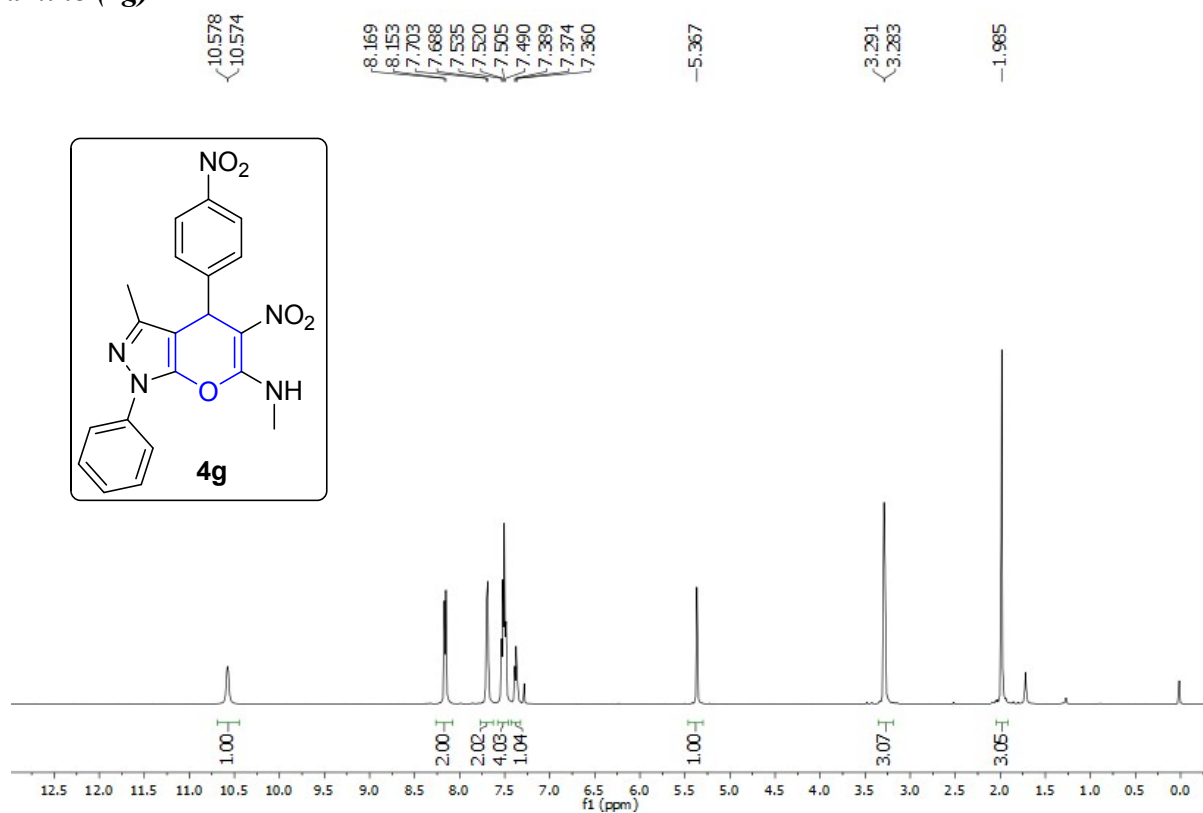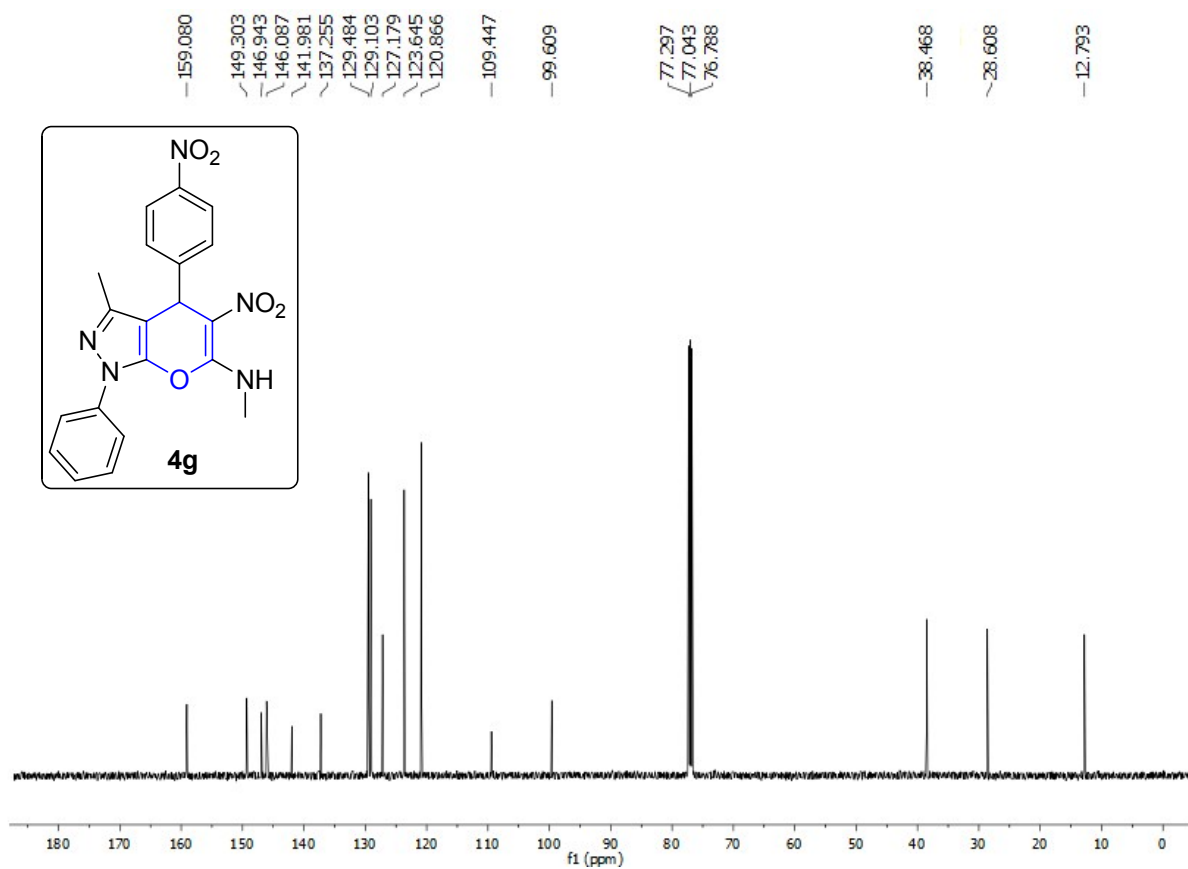

**4-(4-Methoxyphenyl)-N,3-dimethyl-5-nitro-1-phenyl-1,4-dihydropyran[2,3-c]pyrazol-6-amine (4h)**

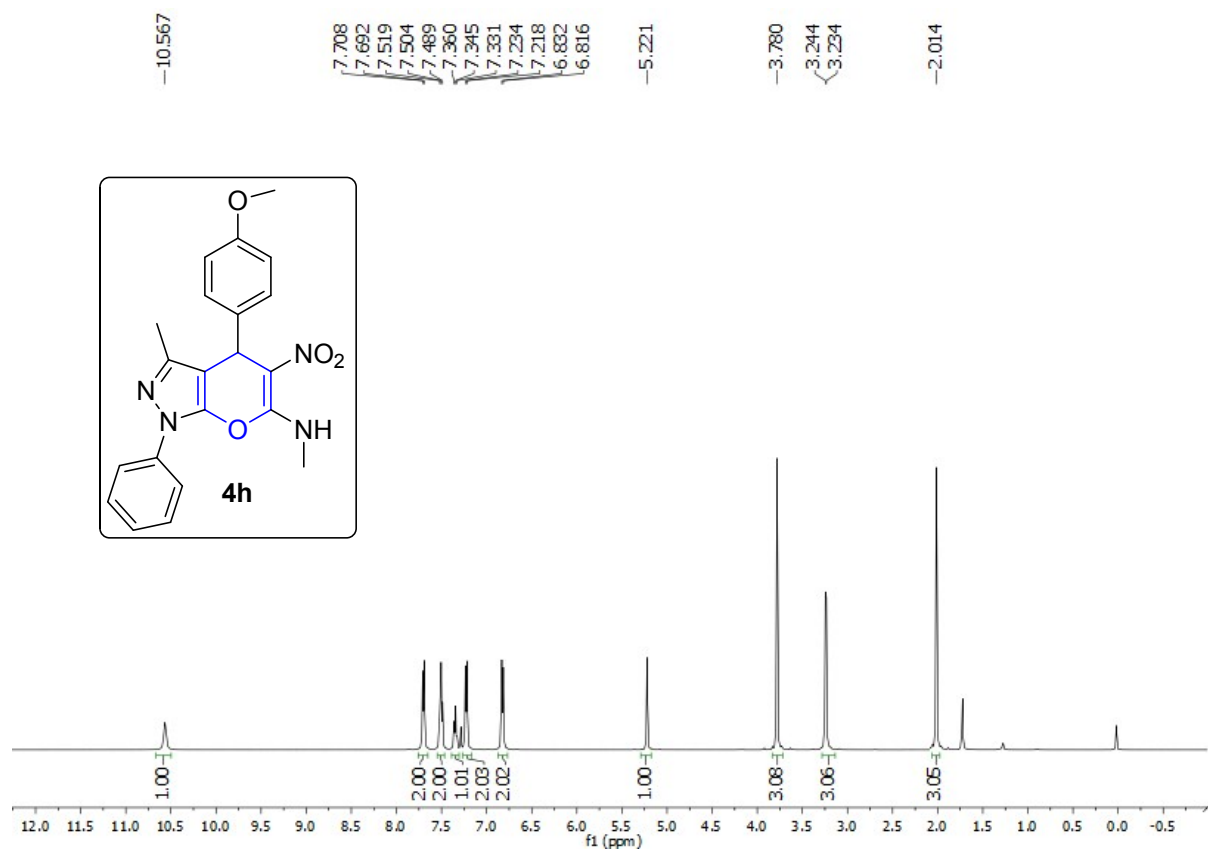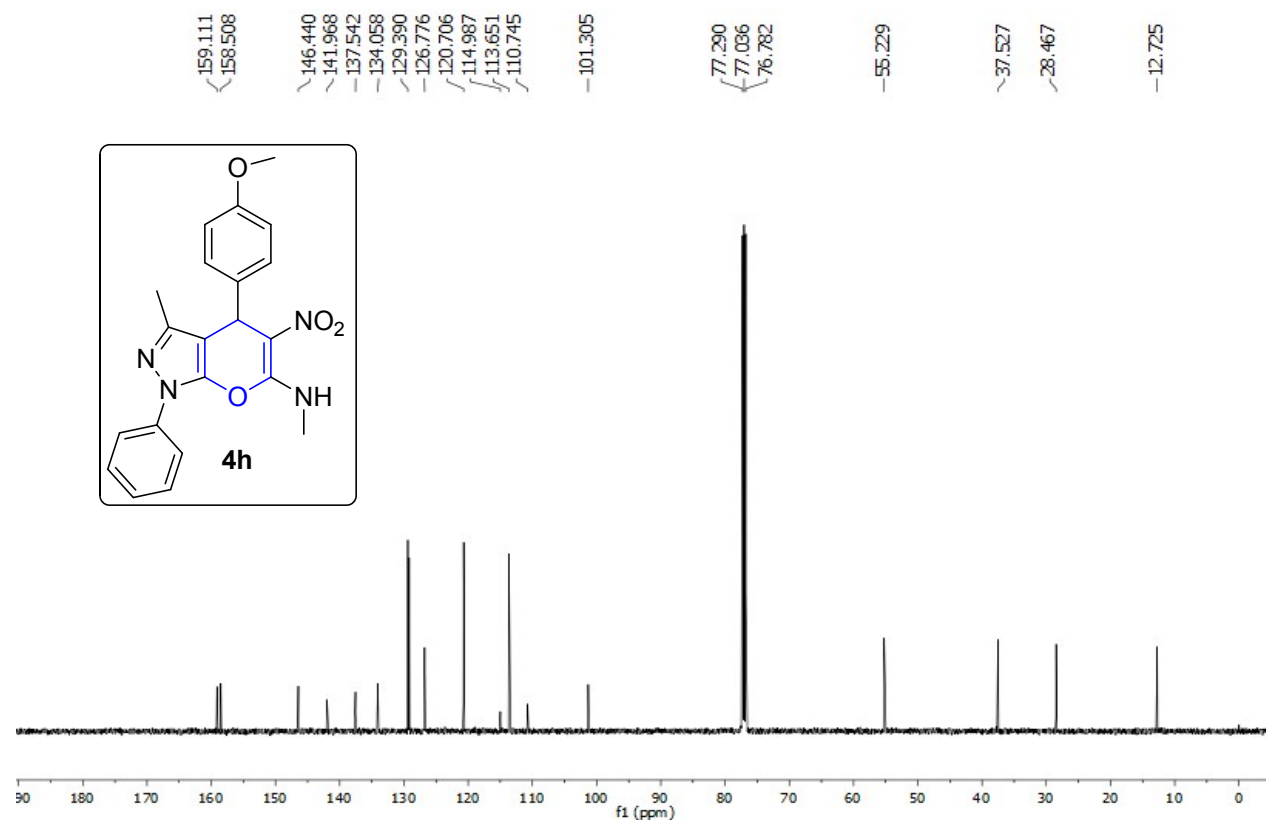

**4-(2-Chlorophenyl)-N,3-dimethyl-5-nitro-1-phenyl-1,4-dihydropyran[2,3-c]pyrazol-6-amine (4j)**

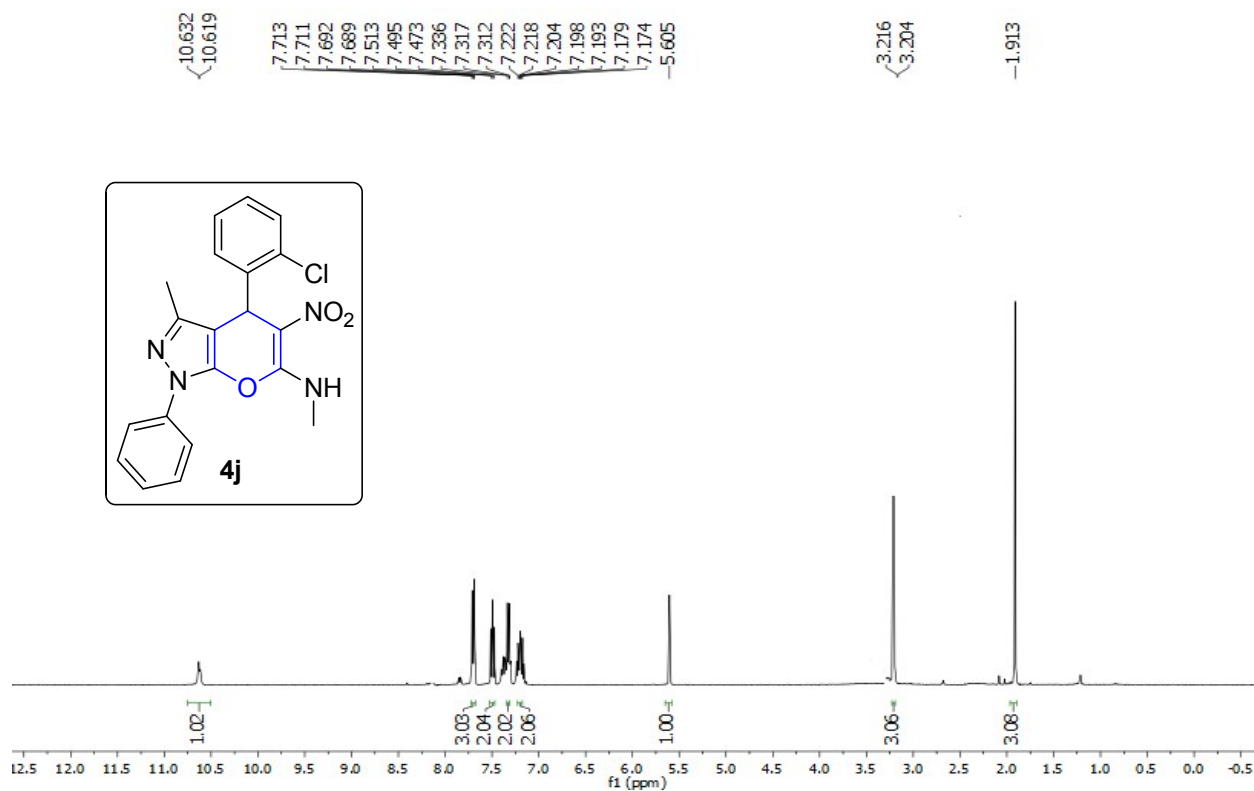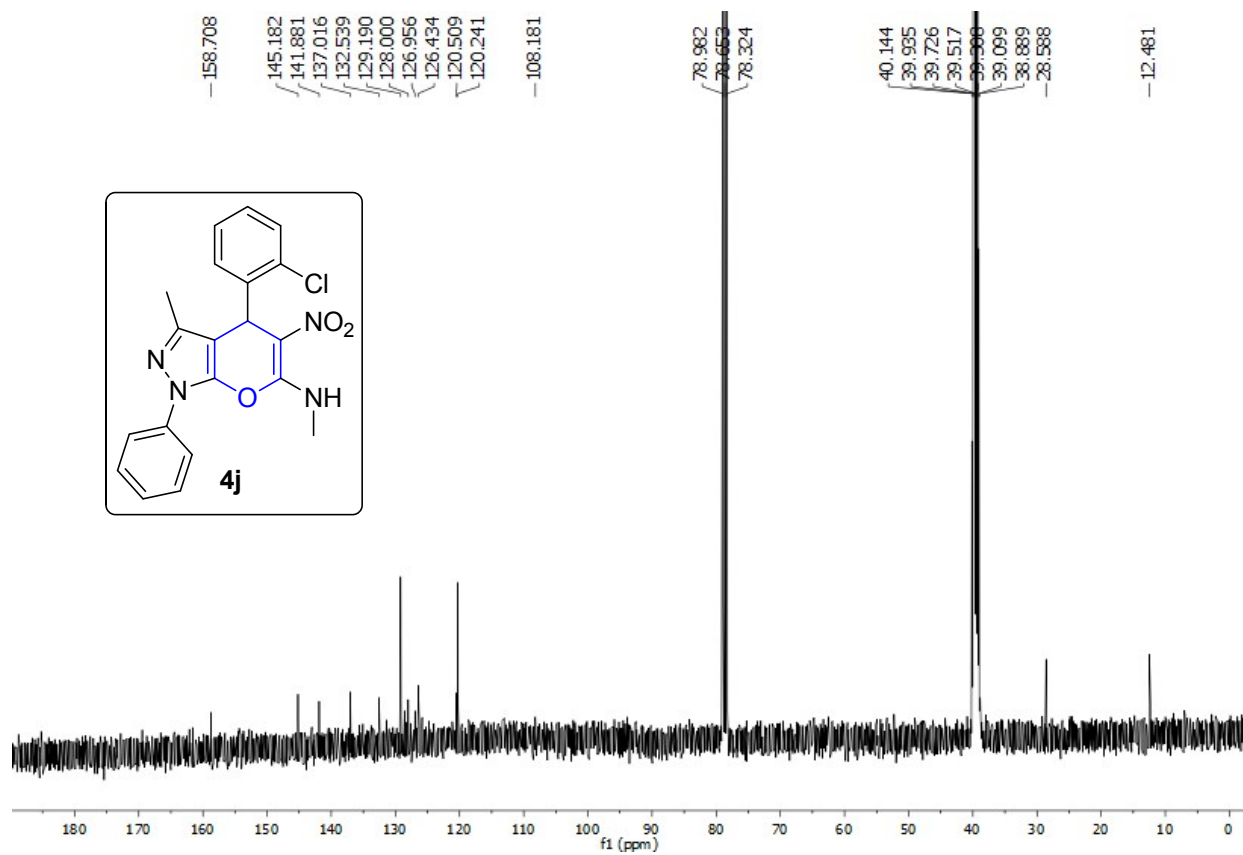

***N, 3-Dimethyl-5-nitro-4-(3-nitrophenyl)-1-phenyl-1,4-dihydropyrano[2,3-c]pyrazol-6-amine (4I)***

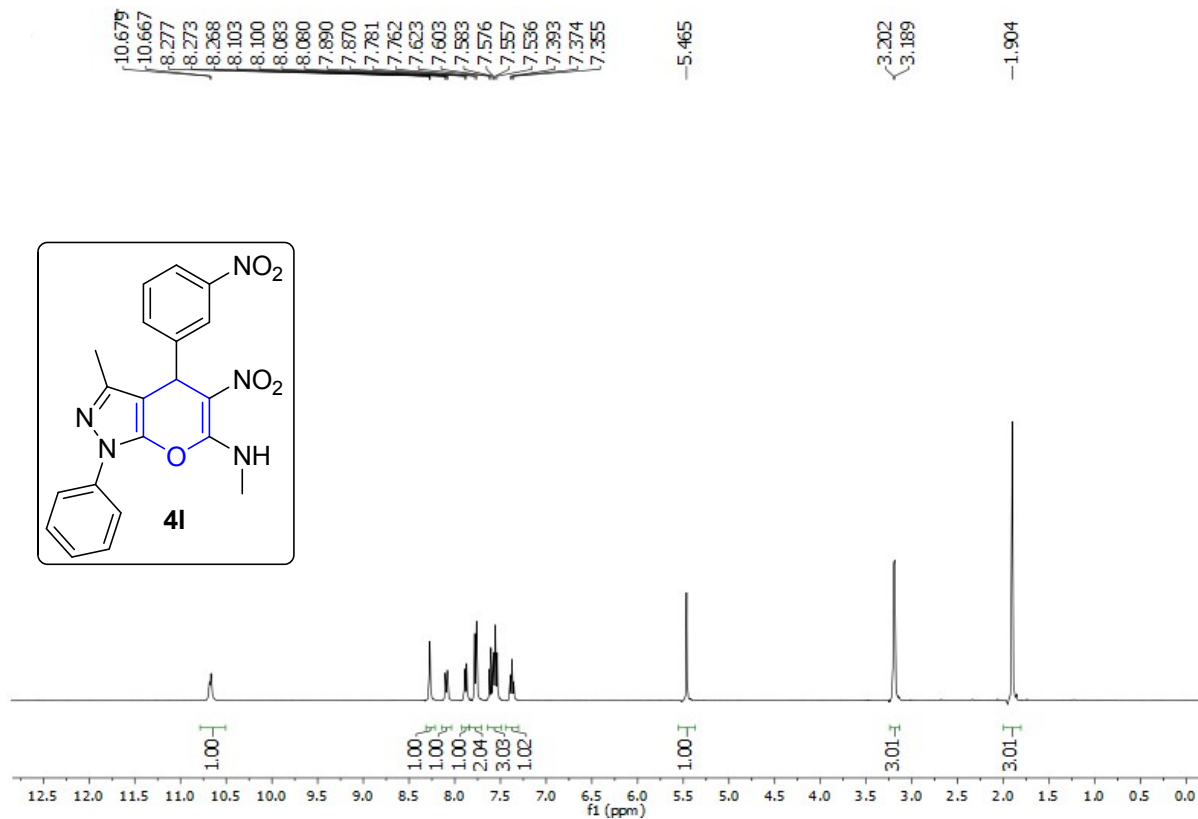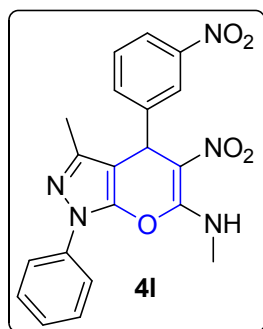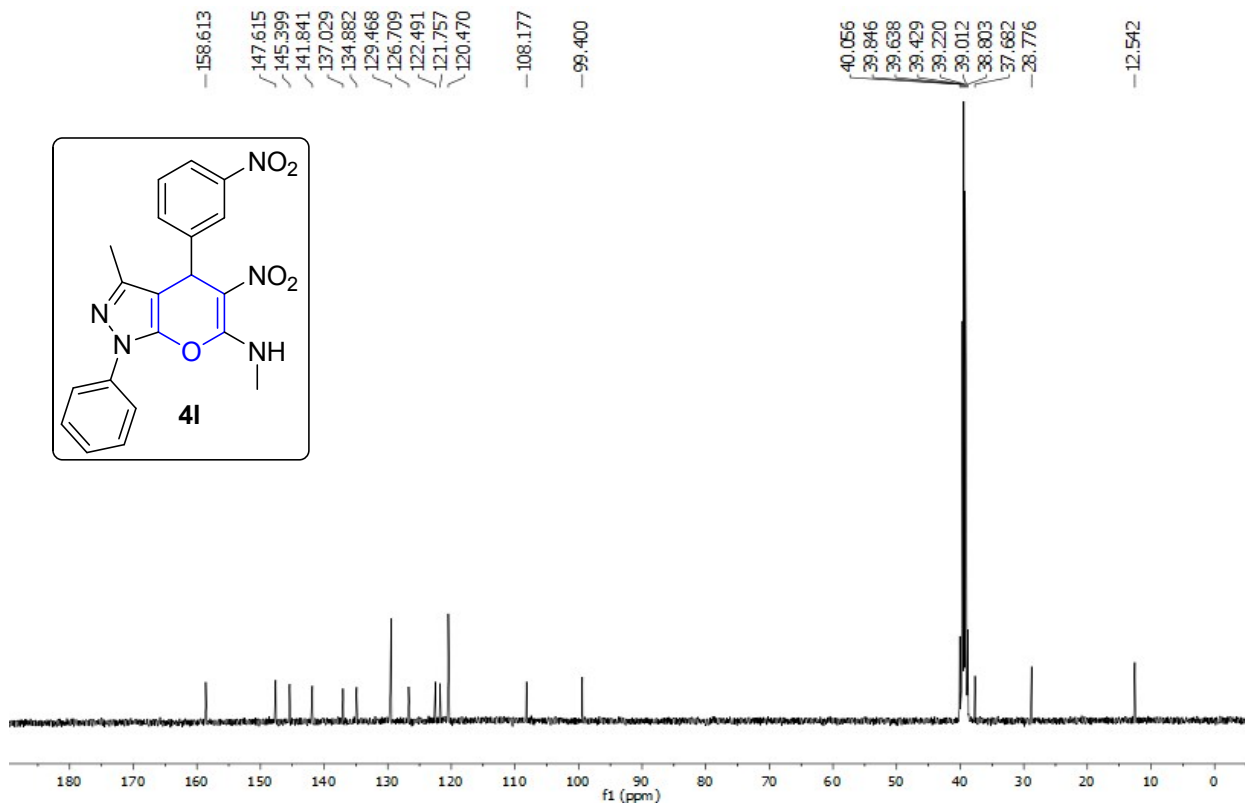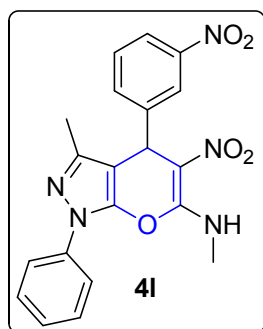

***N*, 3-Dimethyl-5-nitro-1-phenyl-4-(3,4,5-trimethoxyphenyl)-1,4-dihydropyrano[2,3-*c*]pyrazol-6-amine (4n)**

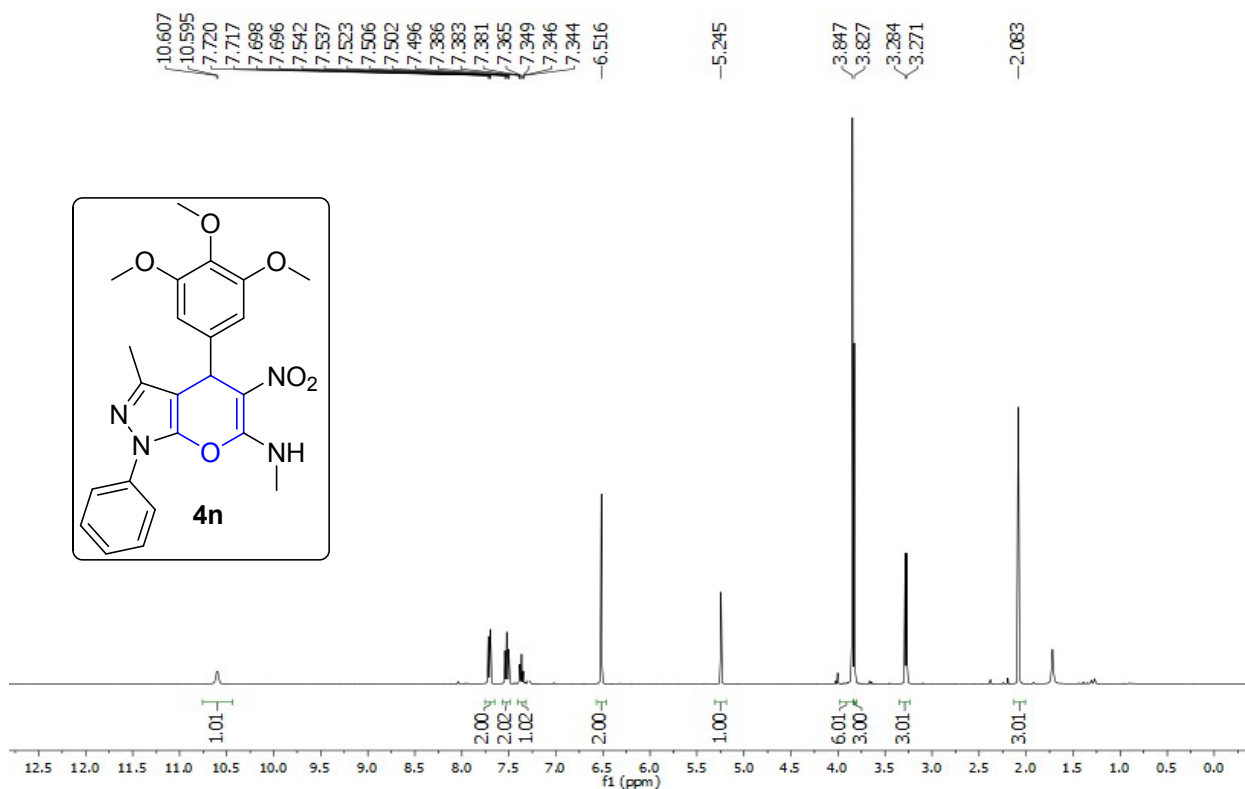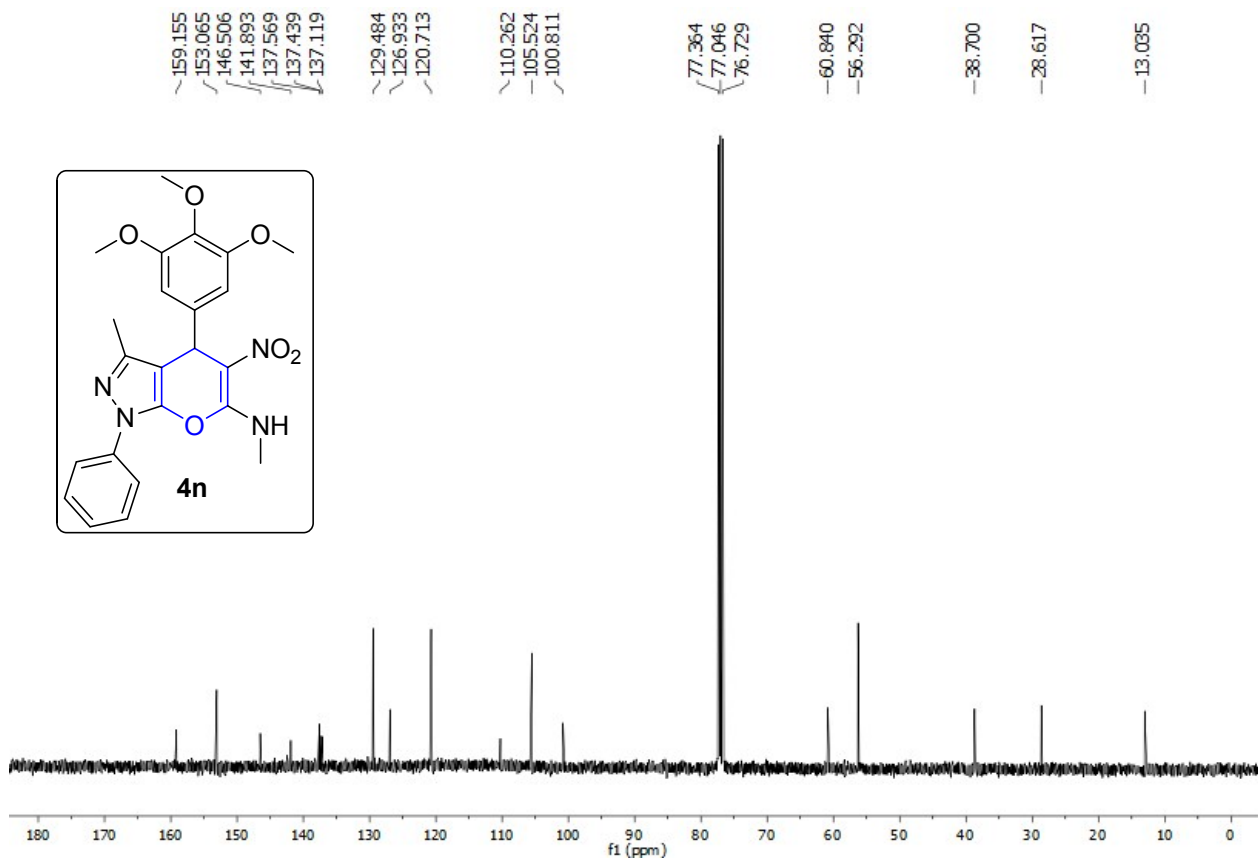

*N*,3-Dimethyl-5-nitro-1-phenyl-4-(pyridin-3-yl)-1, 4-dihydropyrano[2,3-*c*]pyrazol-6-amine  
(4o)

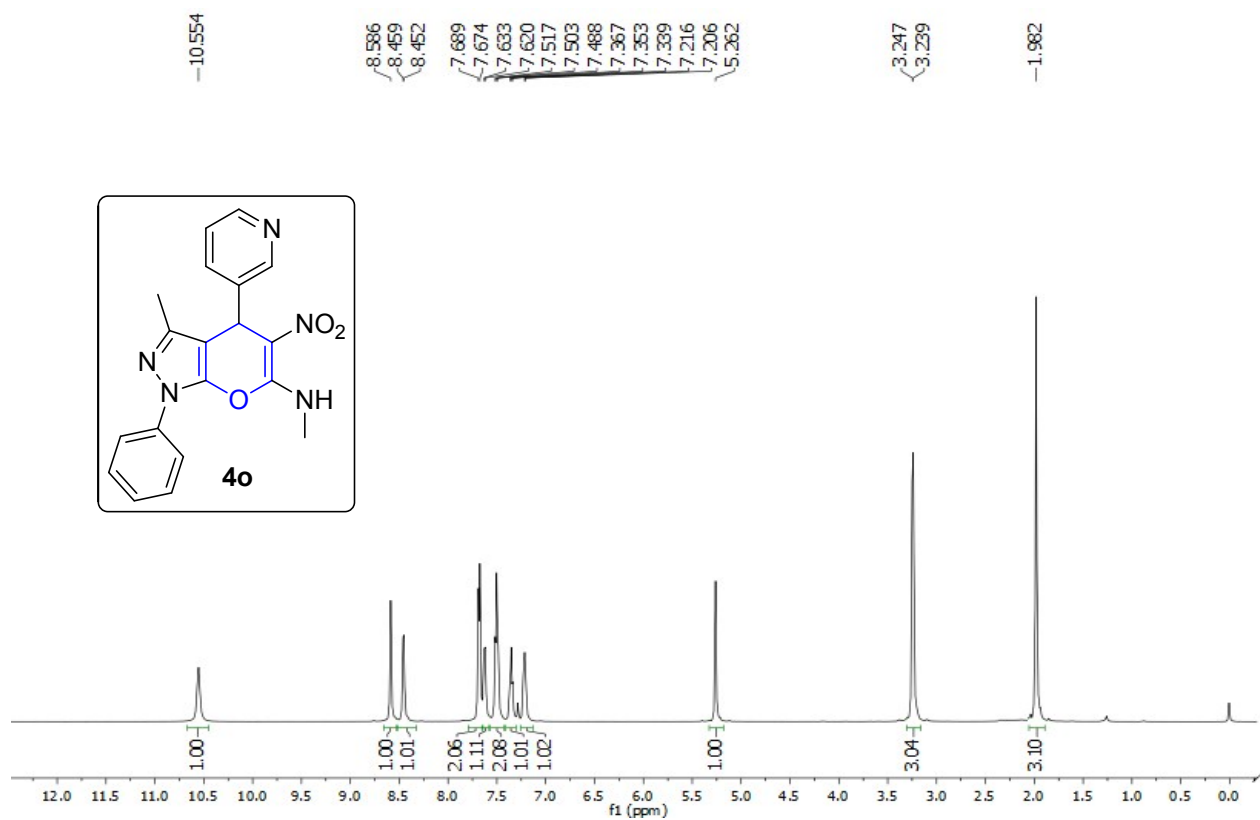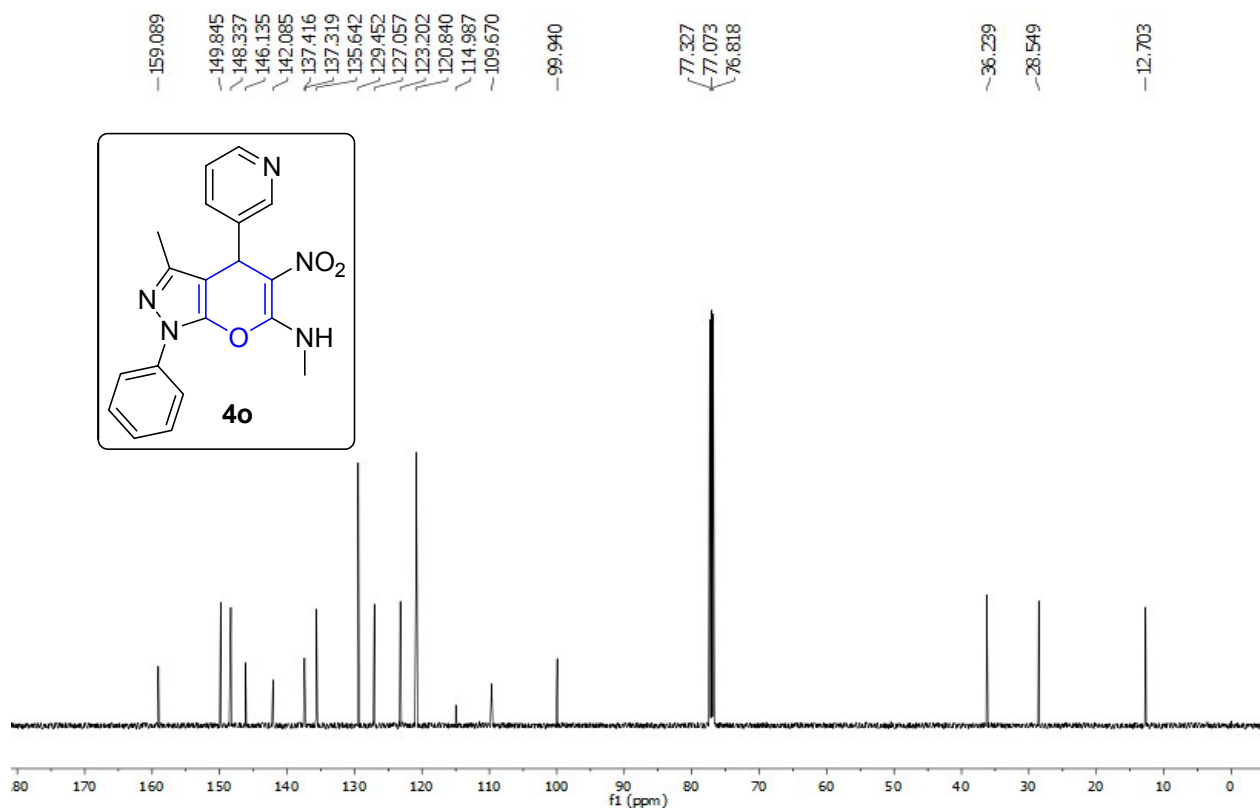

**2-(Methylamino)-3-nitro-4-phenylpyrano[3,2-c]chromen-5(4H)-one (6a):**

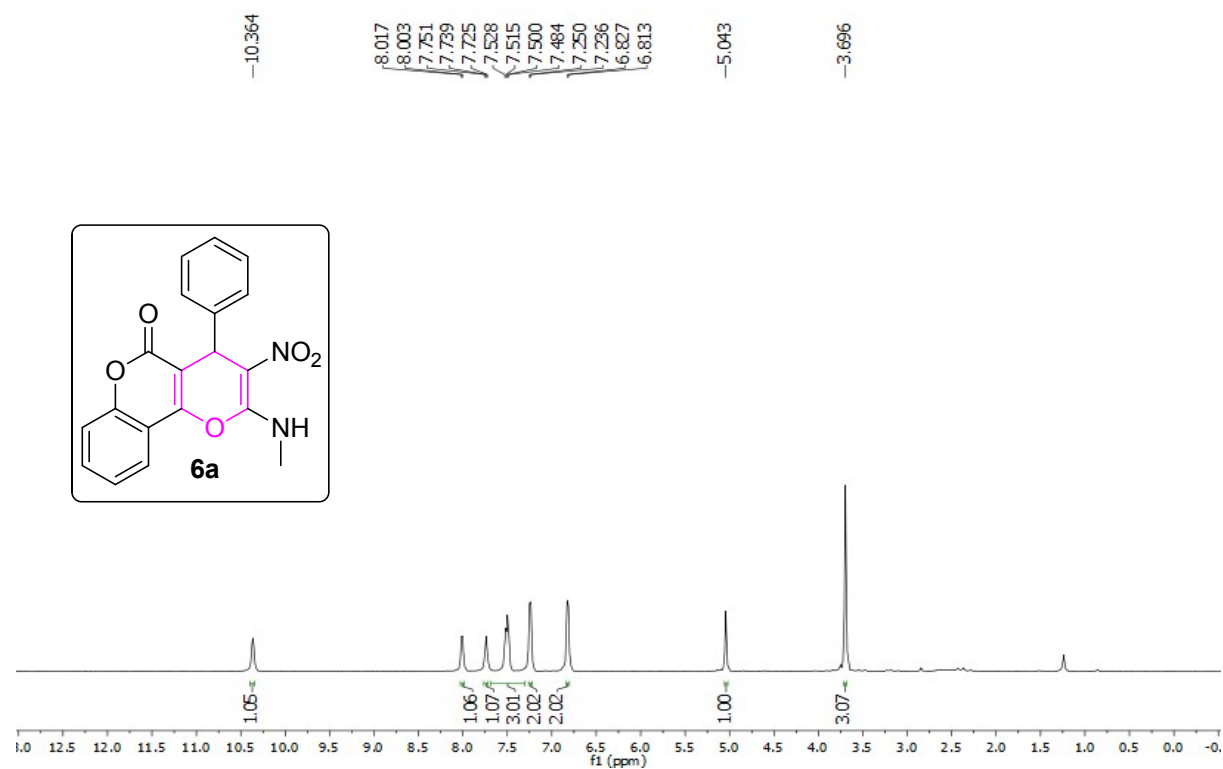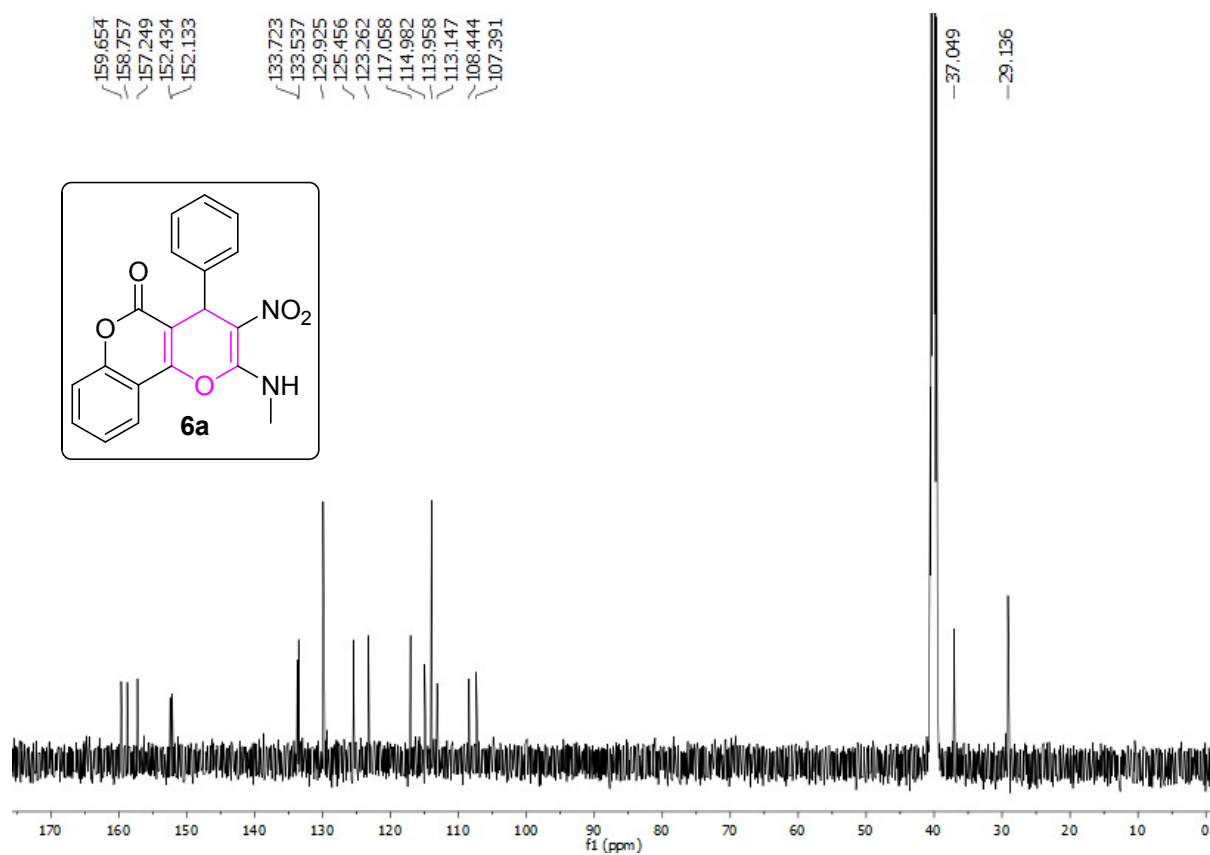



4-(4-chlorophenyl)-2-(methylamino)-3-nitropyrano[3,2-c]chromen-5(4H)-one (6b):

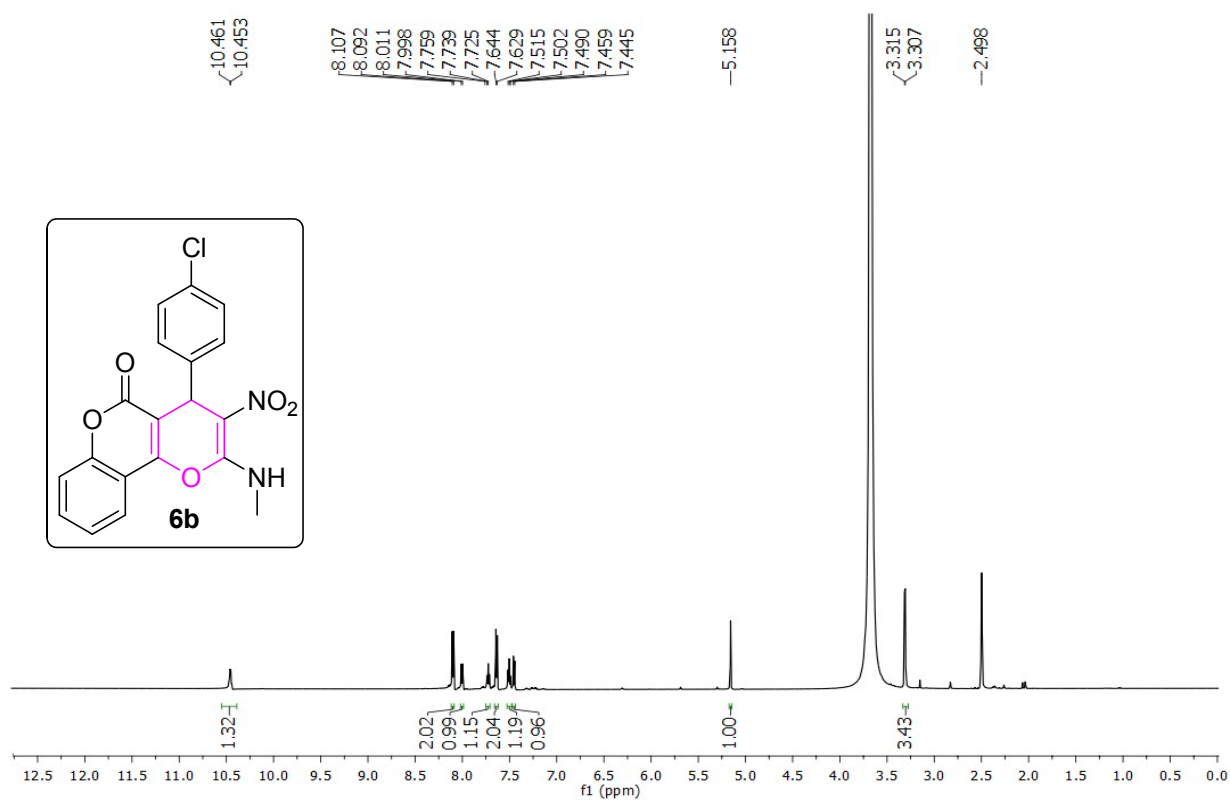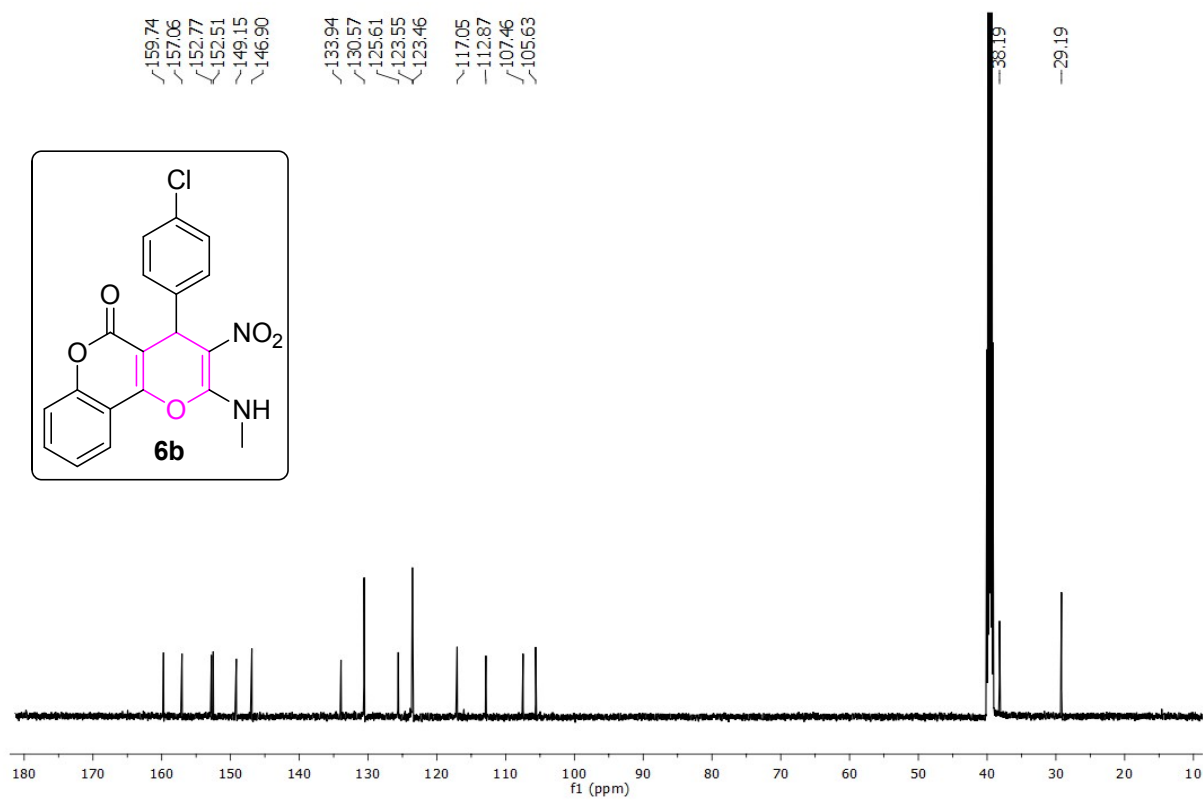

**4-(4-Fluorophenyl)-2-(methylamino)-3-nitropyrano[3,2-c]chromen-5(4H)-one (6d)**

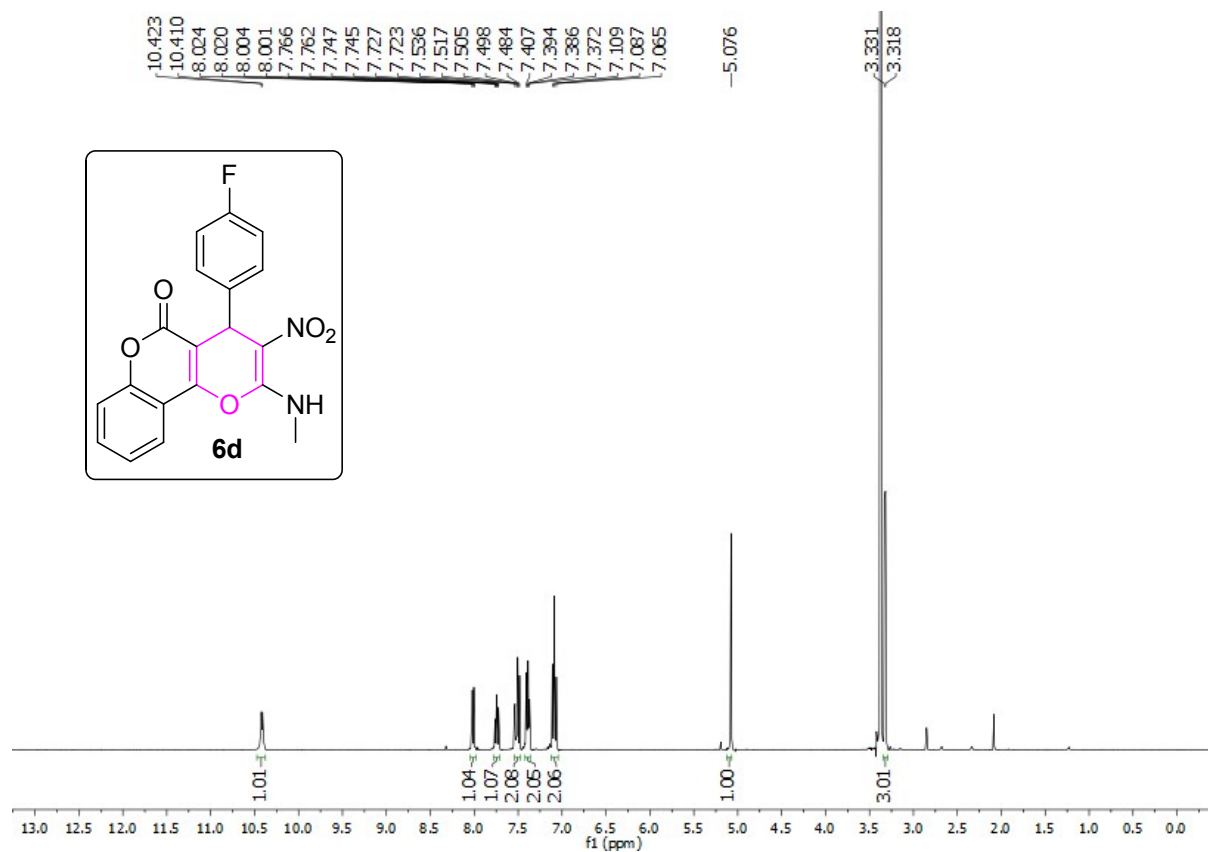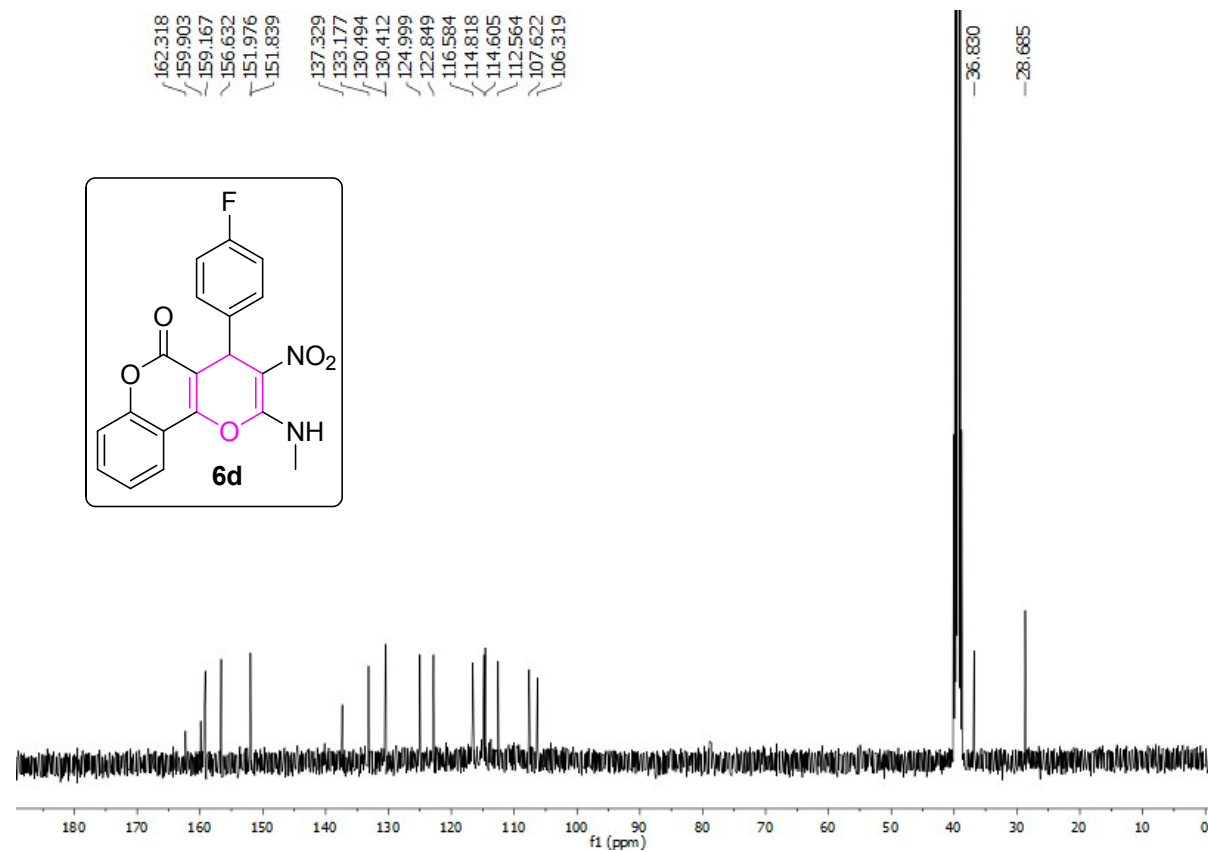

**4-(4-Ethylphenyl)-2-(methylamino)-3-nitropyranof[3,2-c]chromen-5(4H)-one (6h)**

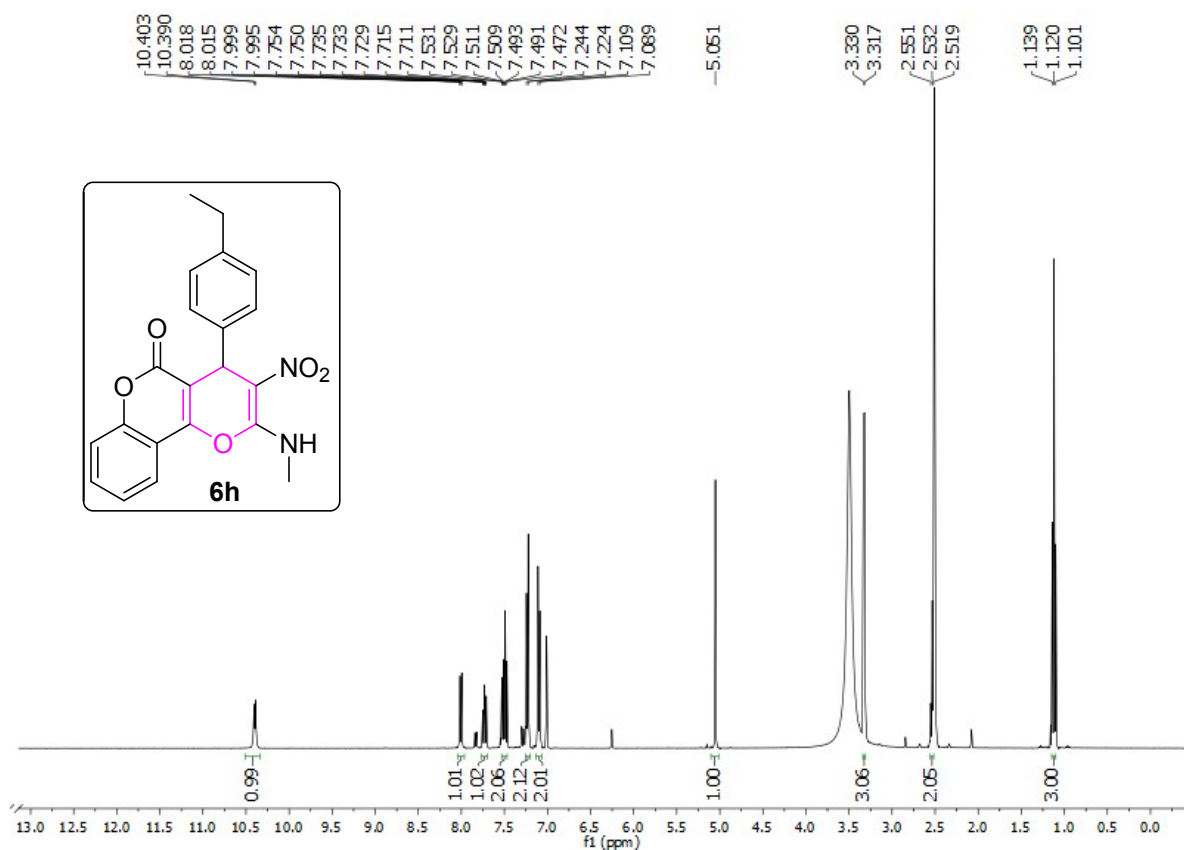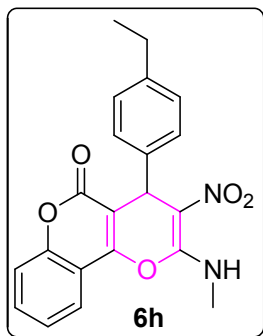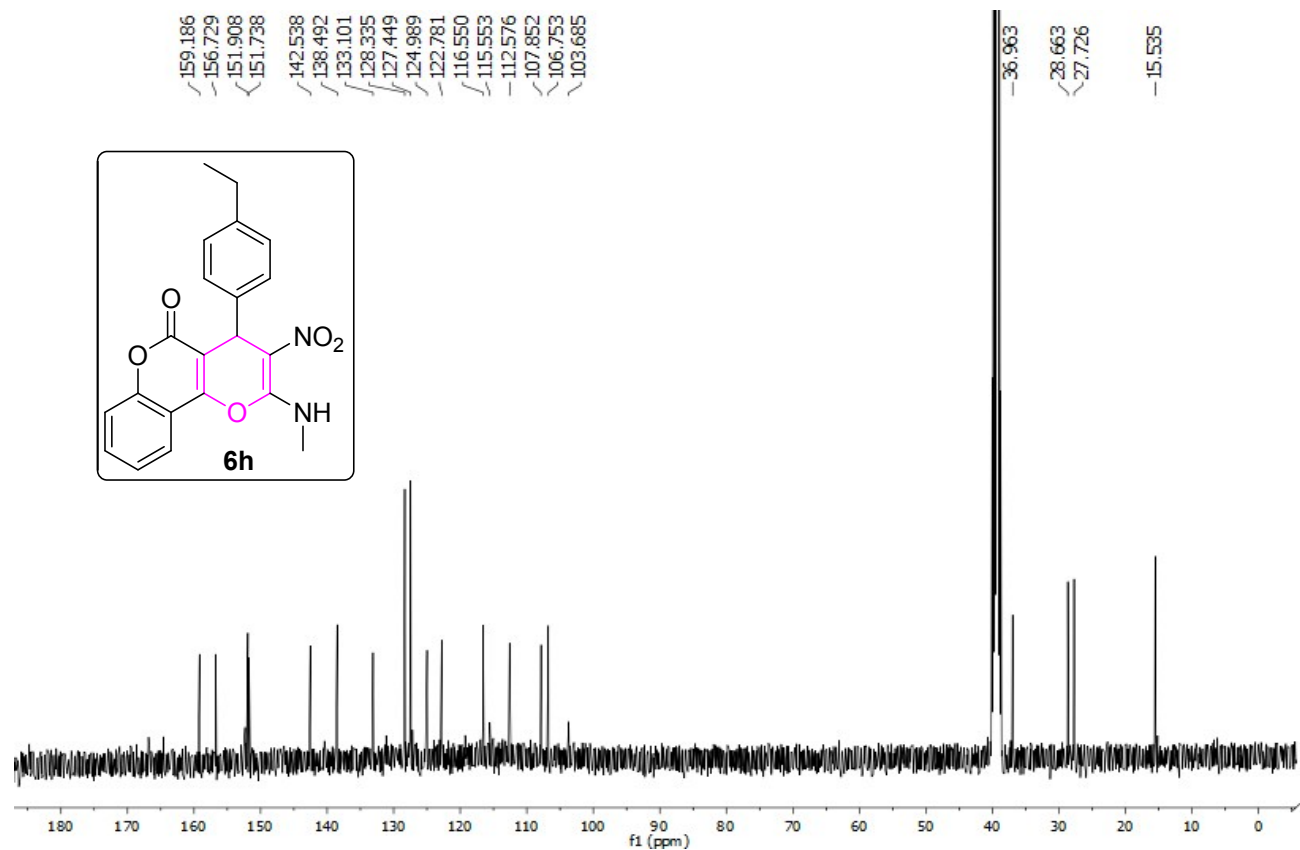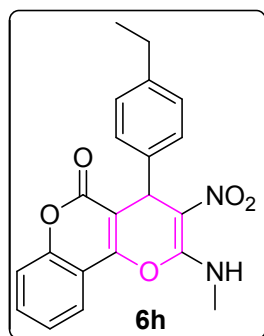

4-(3-Chlorophenyl)-2-(methylamino)-3-nitropyrano[3,2-c]chromen-5(4H)-one (6l)

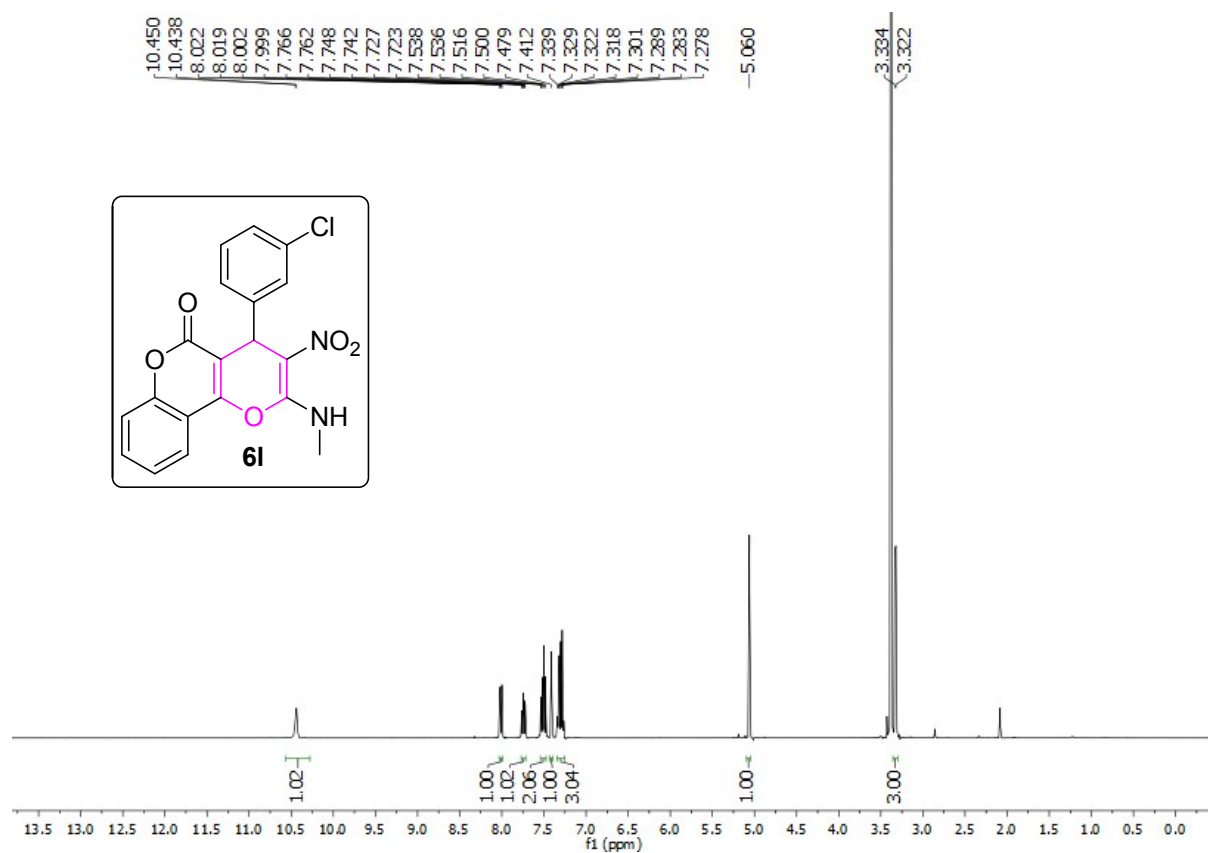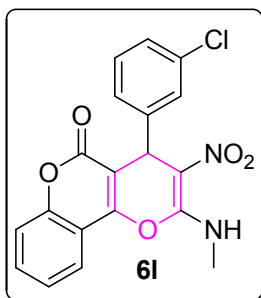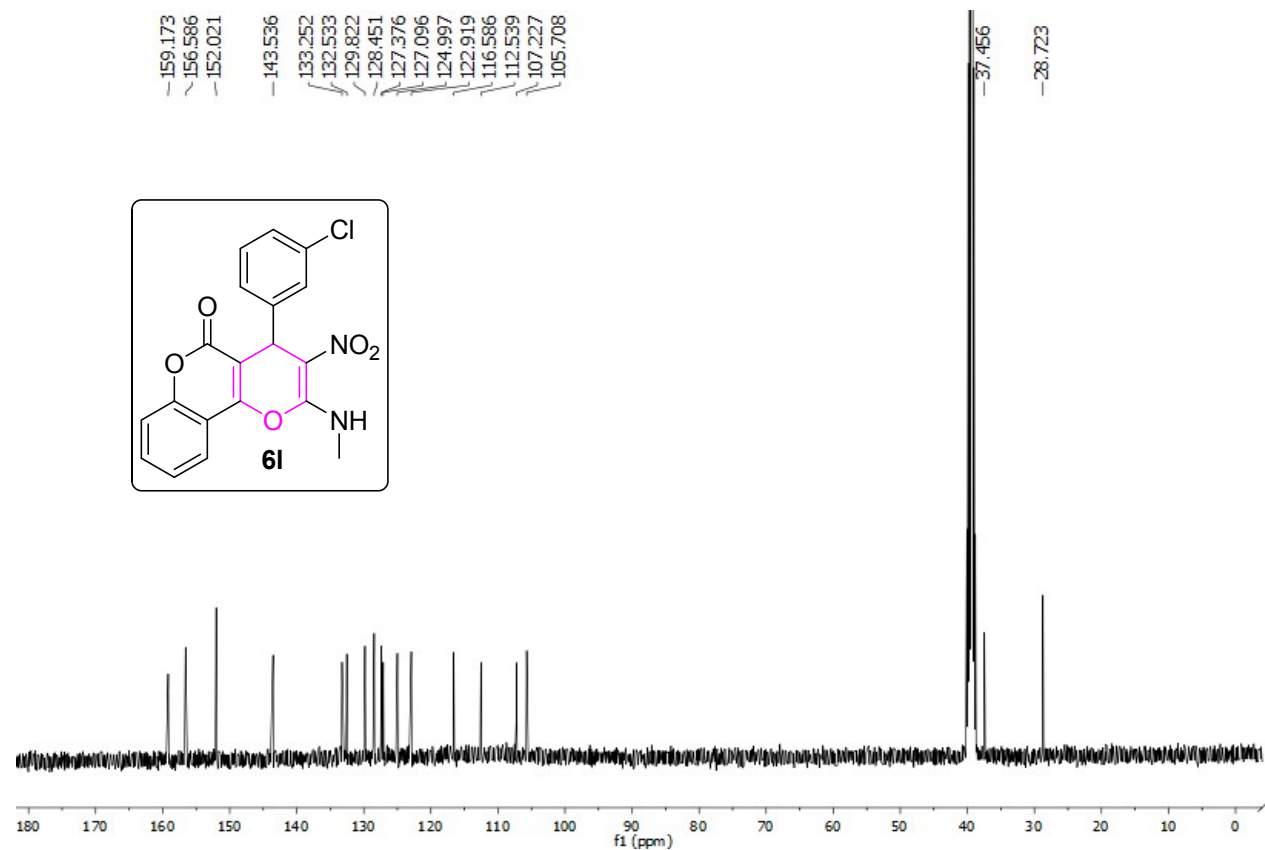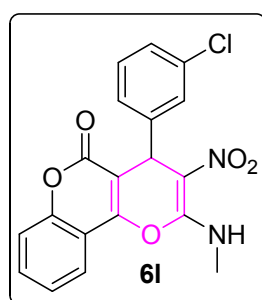

#### IV. HRMS spectra of selected compounds

##### (4a) *N*,3-Dimethyl-5-nitro-1,4-diphenyl-1,4-dihydropyranol[2,3-*c*]pyrazol-6-amine

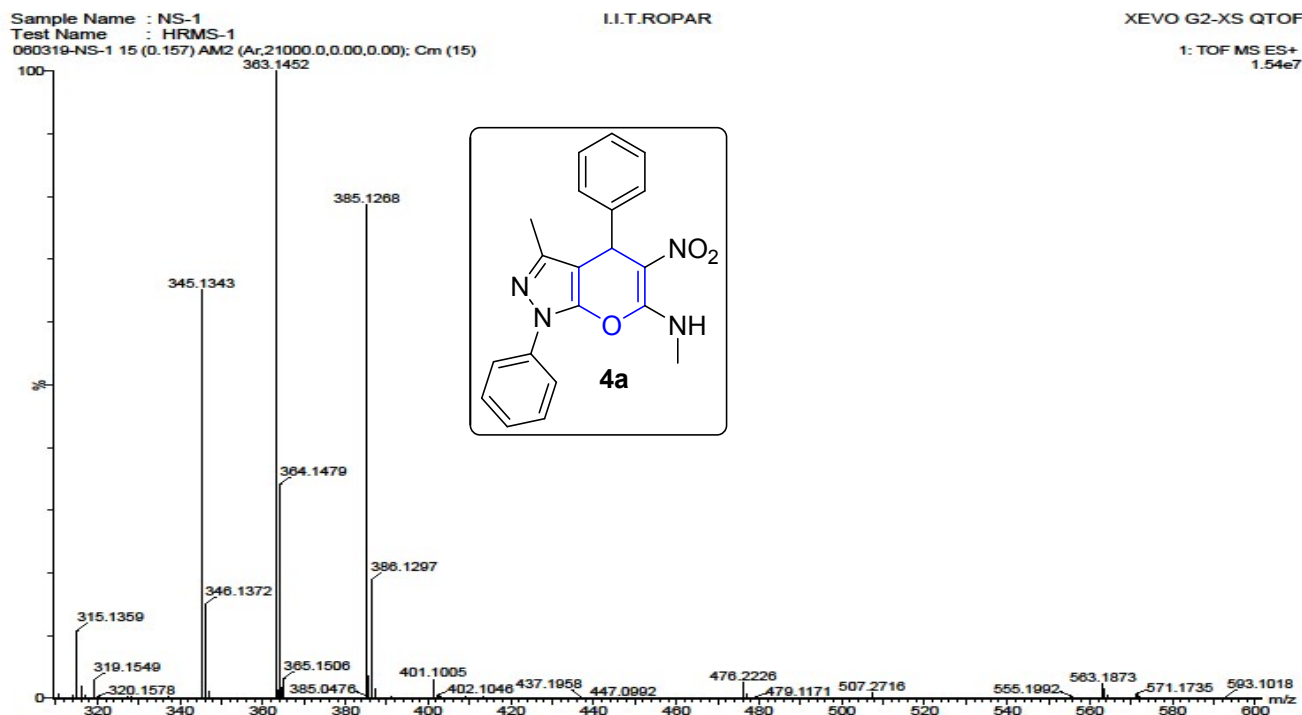

##### (6a) 2-(Methylamino)-3-nitro-4-phenylpyrano[3,2-*c*]chromen-5(4*H*)-one

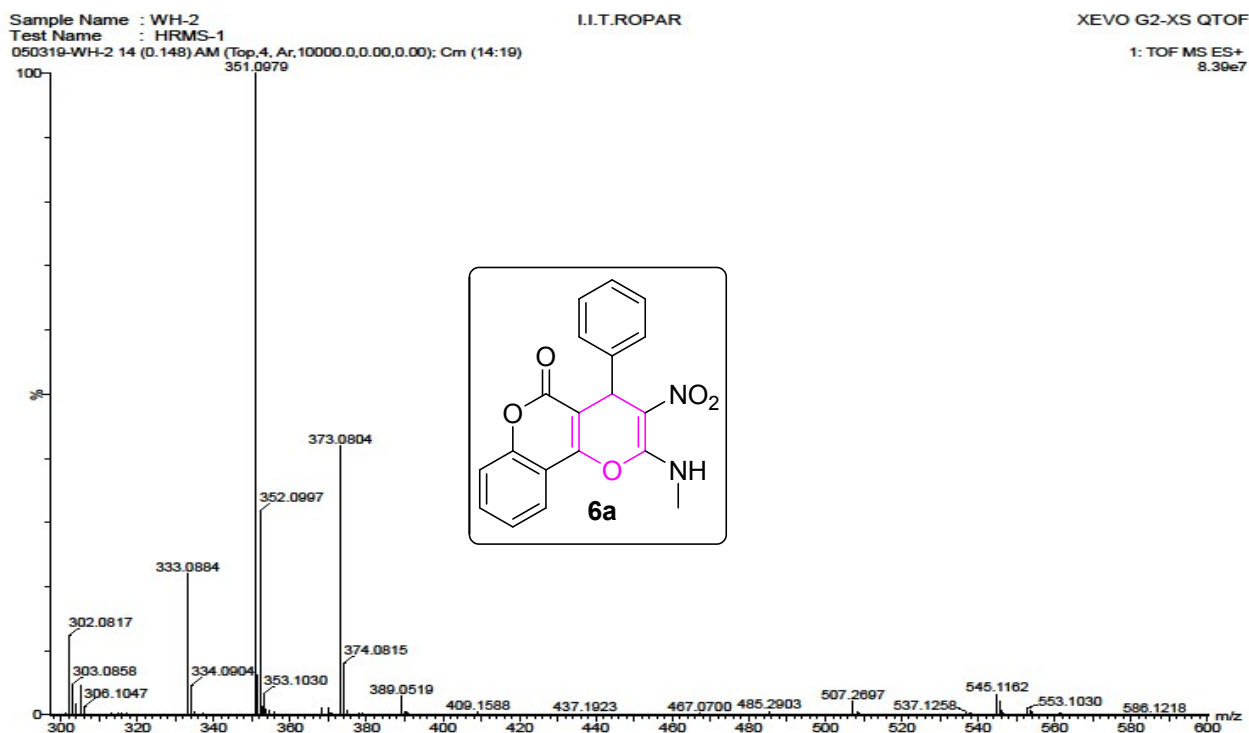

Supplement: c9ra04370e1.pdf [file c9ra04370e1.pdf]
